# Supplementary material for: miR-543 regulates the epigenetic landscape of myelofibrosis by targeting TET1 and TET2.
Source: JCI journal article supplement (doi:10.1172/jci.insight.178762), 2024-02-08
Supplement: sd1 [file 1]

***miR-543 regulates the epigenetic landscape of myelofibrosis by targeting  
TET1 and TET2***

**SUPPLEMENTAL METHODS**

**miR-543 precursor sequence for expression Plasmid construction**

hsa-mir-543 MI0005565:

UACUUA AUGAGAAGUUGCCCGUGUUUUUUUCGCUUUAUUUGUGACGAAACA UUCGCG  
GUGCACUUCUUUUUCAGUAUCTACTTAATGAGAAGTTGCCCGTGTTTTTTTCGCTTTATTT  
GTGACGAAACATTCGCGGTGCACTTCTTTTTTCAGTATC

480 bp sequence surrounding the hairpin:

agcagctccaggacacaatgccacctgtgcagagggggcagacctgtagatgtctcccaggtcttgagggggtgtatgcacggccatatctttg  
tcacCGGTTGCCCGGTGCGCATCAGGACCCATGTGCTCTCAGGAAGCCCGCAGGAGTGATAC  
CAGCCGCGGAGAAGCAGTGTTGTCAACGGTGCTGACGTGCGGTACTTAATGAGAAGTTGC  
CCGTGTTTTTTTCGCTTTATTTGTGACGAAACATTCGCGGTGCACTTCTTTTTTCAGTATCCT  
ATTCTGCCTTGAAGACGTCTTGGTTTGGGTGCAACTTCAGGGAAGGCACATGGGCCCTGT  
AGTGGACGCTGATCAGGACCTCCCTACCCCATGTCTTtctccttctctaaattctcctgtttttttttttttttttttttttat  
gaaagetcccgtcttcccgcgtgtgctttgattgcattgacctgcccc

Primers (product size: 436 bp):

miR543 1F ggacacaatgccacctgtg

miR543 1R gggaagacgggagctttcat

Restriction enzymes: EcoRI and NotI

**Luciferase assay**

The identified STAT3 binding site on promoter region of the miR-543 gene was cloned in the pGL3 luciferase reporter vector (Promega) with the following primers;

Binding site-FW- GCATCCTCCTACGCAAGTCT

Binding site-RV- CAACCCAGTGTCACACAAC

HEK-293 cells were plated ( $1 \times 10^5$  cells/well) in 24 well plate before 24 hours transfection. Subconfluent cells were transfected with pGL3 luciferase reporter vectors containing the potential

binding sites for STAT3 (400ug/well), control vector (400ug/well) and 8 ng of the pRLTK reporter (Renilla luciferase for internal control) together with 50 nmol/L miR-543 mimic or control miRNA using lipofectamine 2000 (Life technologies). Cells were harvested 36 hours post-transfection and luciferase activity was measured by the Dual-Luciferase® Reporter 1000 Assay System according to the manufacturer's instructions (Promega). All experiments were performed in triplicate.

### **Green fluorescence protein (GFP)-lentiviral-STAT3-shRNA generation and infection**

HEK 293FT cells were transfected with seven micrograms of GFP-lentivirus STAT3-shRNA or with GFP-lentivirus empty vector using Lenti-X™ Packaging Single Shots according to the manufacturer's procedures (Takara Bio USA, Inc). HEK 293FT cell culture medium containing viral particles was collected at 48 hours after transfection and filtered with 0.45 µm syringe filter to remove floating cells (Cat#723-2545, Thermo Fisher Scientific, Waltham, MA, USA). K562 cells incubated in six-well plates in with lentiviral supernatant and GFP positive cells were sorted by flow cytometer. Knockdown efficiency of STAT3 determined by Western blot in K562 cells.

## SUPPLEMENTAL FIGURES

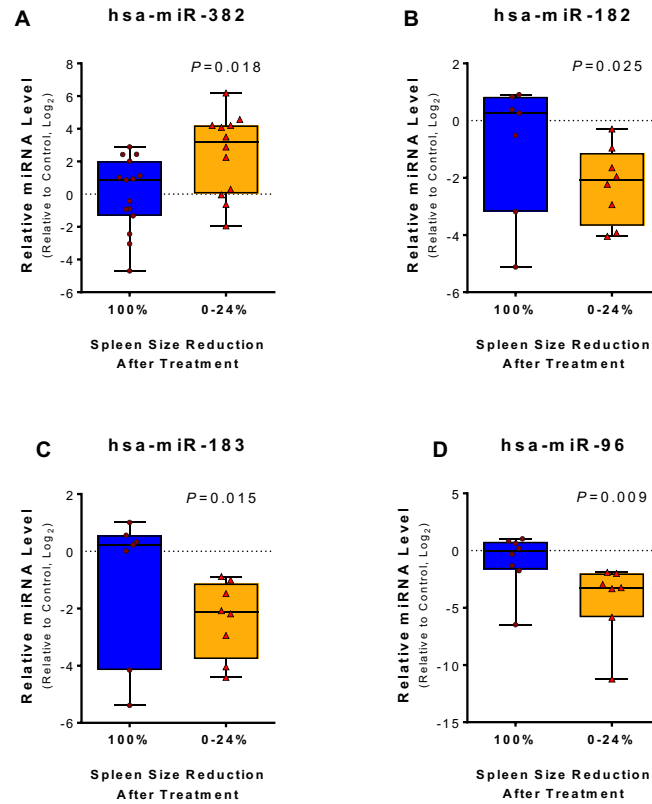

**Supplemental Figure 1. MiRNAs expression validation in BM of MF patients differs according to responsiveness to treatment. (A-D)** Differential expression of (A) miR-382, (B) miR-182, (C) miR-183, and (D) miR-96 according to responsiveness to treatment was further validate by RT-qPCR in the same cohort of patients in **Figure 1**. MiRNA expression levels were normalized by the  $\Delta$ Ct method using small nuclear RNA U6 and the small nucleolar RNA U48 as reference genes.

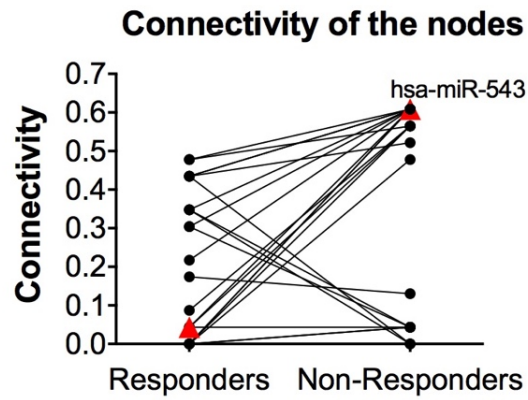

**Supplemental Figure 2. Connectivity of the nodes.** The connectivity of the nodes of the responders' miRNAs network is significantly lower compared to the node connectivity of the non-responders miRNAs network ( $P=0.0137$ ). Red solid triangles represent hsa-miR-543 in each connectivity of nodes.

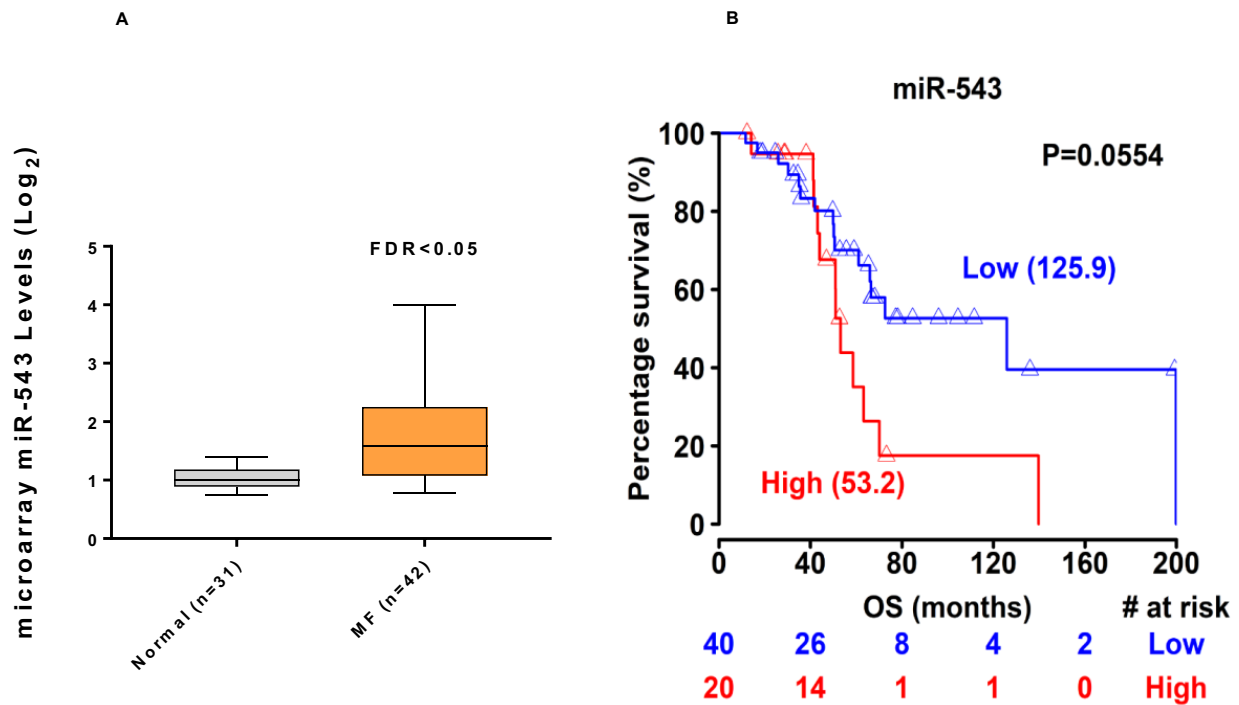

**Supplemental Figure 3. The correlation between miR-543 levels and the overall survival of MF patients.** (A) Differential expression (FDR<0.05) of miR-543 in primary MF patients (n=42) and healthy donors (peripheral blood n=16 and bone marrow=15). Data generated from the publicly available datasets (microarray GSE53482). (B) Kaplan Maier plots displaying association of miR-543 expression with overall survival in a cohort of 60 patients with MF from MD Anderson Cancer Center. For overall survival, time was calculated from diagnosis to death due to any cause or last contact. In order to visualize the survival difference we used the log-rank test to find the point (cut-off) with the most significant (lowest p-value) split in high vs low mRNA level groups. The Kaplan-Meier plots were generated for these cutoffs (0.67). The numbers of patients at risk in low and high miRNA groups at different time points are presented at the bottom of the graph. In brackets, we present median survival months in each group.

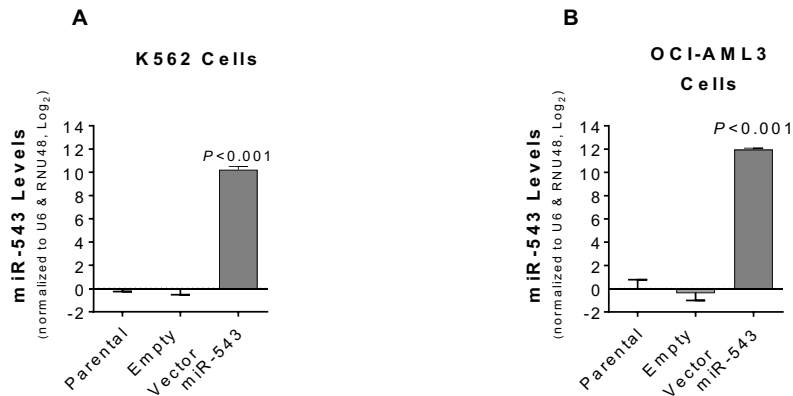

**Supplemental Figure 4. RT-qPCR analysis of miR-543 levels in K562 and OCI-AML3 cells. (A-B)** Expression of miR-543 measured by qRT-PCR in K562 parental cells and stable transfected with empty vector (control) or p-miR-543 expression vector. U6 and RNU48 levels were used as normalizers.

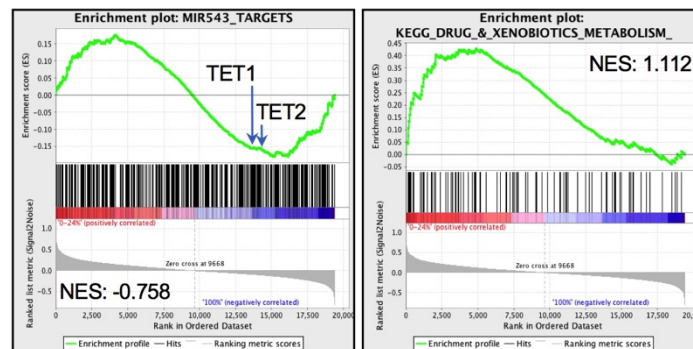

**Supplemental Figure 5. miR-543 promotes drug metabolism related gene enrichment in MF patients with no significant response to ruxolitinib treatment.** Gene enrichment analysis in MF patients not responding to ruxolitinib treatment (0-24% reduction in splenomegaly) compared to MF patients responding to ruxolitinib treatment (100% elimination of palpable splenomegaly).

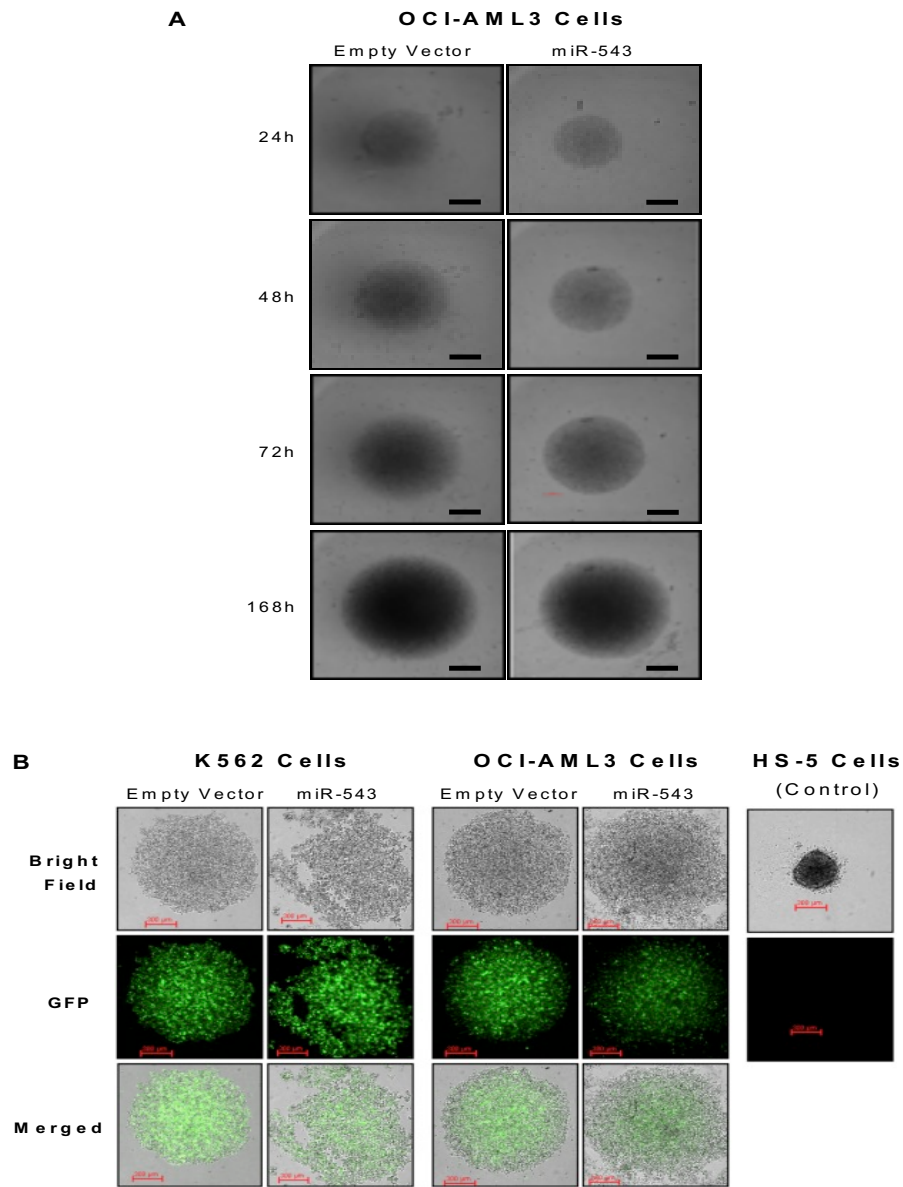

**Supplemental Figure 6. Effect of miR-543 in 3D multicellular tumor spheroids (MCTS) formation.** (A) The effect of miR-543 in 3D multicellular tumor spheroids (MCTS) formation and growth were monitored at different time points for a period of 7 days (24, 48, 72, and 168 h) in OCI-AML3 cells overexpressing miR-543 compared to those cells stably transduced with empty vector. Scale bars represent 300 $\mu$ m. (B) Representative 3D multicellular tumor spheroids of K562 and OCI-AML3 cells stable transfected with empty vector (control) or p-miR-543 expression vector that co-express Green Fluorescence Protein GFP.

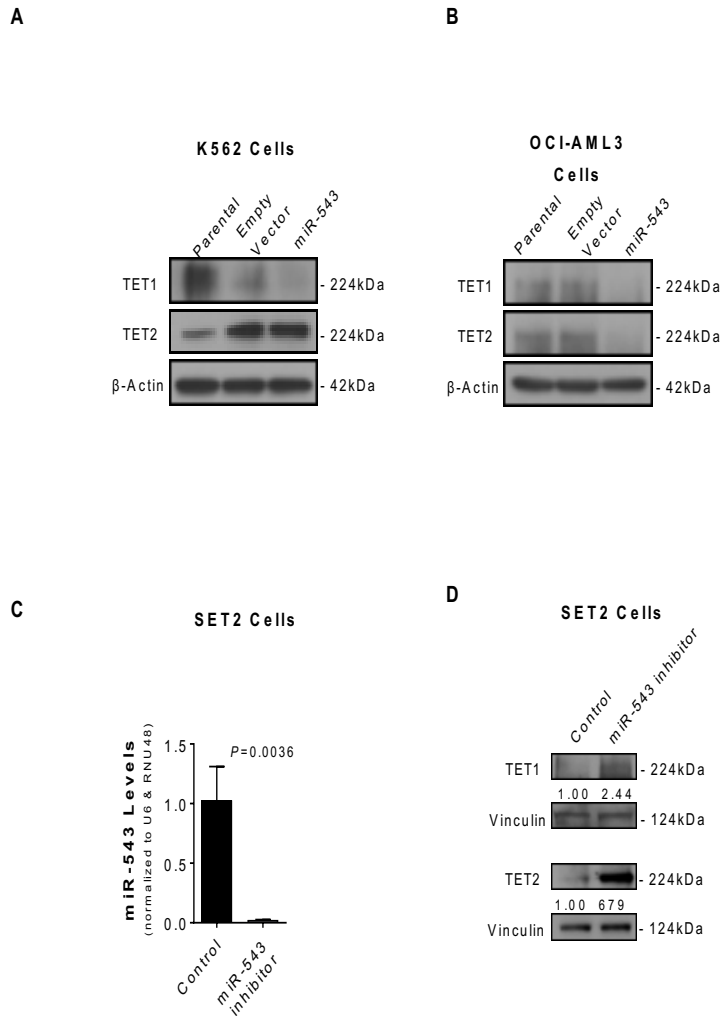

**Supplemental Figure 7. (A-B)** Representative Western blot analysis of TET1 and TET2 protein in K562 parental and OCI-AML3 cells and stably transduced with empty vector (control) or p-miR-543 expression vector.  $\beta$ -Actin protein levels were used as normalizer. **(C)** Relative expression level of miR-543 after transfection with scramble miRNA inhibitor (control) or miR-543 inhibitor. Relative expression of miR-543 measured by RT-qPCR and normalized to U6 and RNU48 levels ( $n=3$ ; lower panel). **(D)** Representative Western blot analysis of TET1 and TET2 proteins in SET-2 cells transiently transfected with scramble miRNA inhibitor (control) or miR-543 inhibitor. Vinculin protein levels were used as a normalizer.

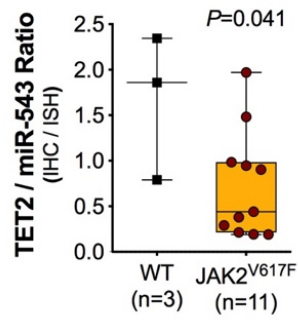

**Supplemental Figure 8. High miR-543 levels correlate with low TET2 protein in MF *in vivo* model.** Ratio of the differential TET2 protein levels measured by immunohistochemistry (IHC) and expression of miR-543 measured by *In Situ* Hybridization (ISH) in wildtype mice and in JAK2<sup>V617F</sup> transgenic mice.

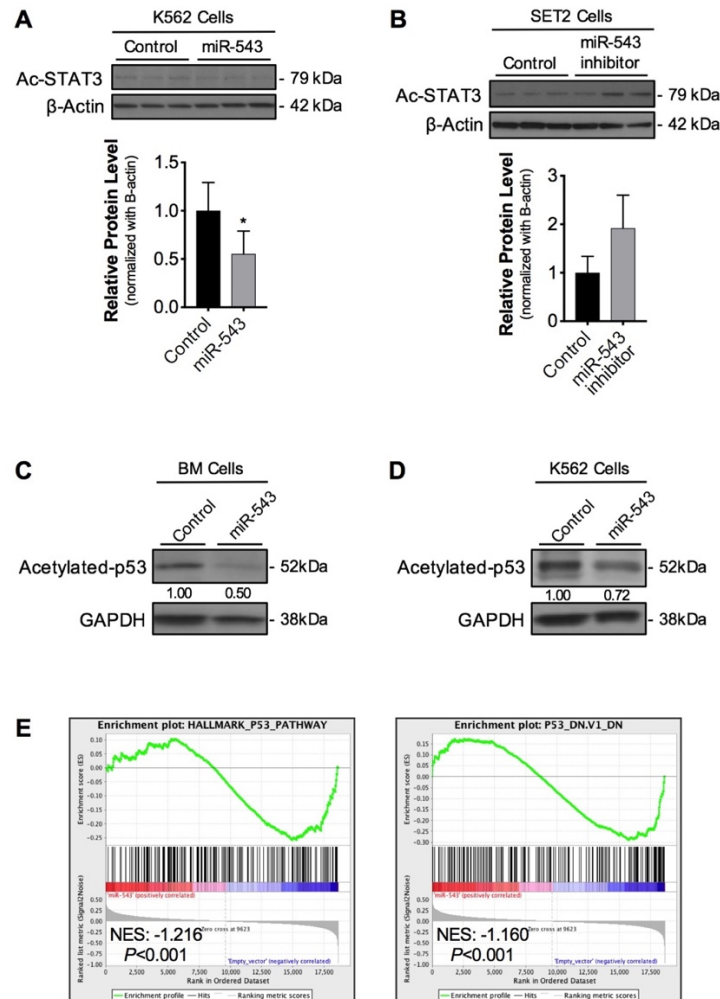

**Supplemental Figure 9. miR-543 induces the decrease of protein acetylation. (A)** Representative Western blot analysis of acetylated-STAT3 protein in K562 cells stably transduced with empty vector (control) or p-miR-543 expression vector. β-Actin protein levels were used as normalizer. **(B)** Representative Western blot analysis of acetylated-STAT3 protein in SET-2 cells transiently transfected with scramble miRNA inhibitor (control) or miR-543 inhibitor. β-Actin protein levels were used as normalizer. **(C)** Representative Western blot analysis of acetylated-TP53 protein in K562 cells stable transfected with empty vector (control) or p-miR-543 expression vector. GAPDH protein levels were used as normalizer. **(D)** Representative Western blot analysis of acetylated-TP53 protein in K562 cells stable transfected with empty vector (control) or p-miR-543 expression vector. GAPDH protein levels were used as normalizer. **(E)** Gene enrichment analysis of p53 pathway-related genes (left panel) and genes downregulated when p53 is downregulated (right panel) in K562 cell overexpressing miR-543.

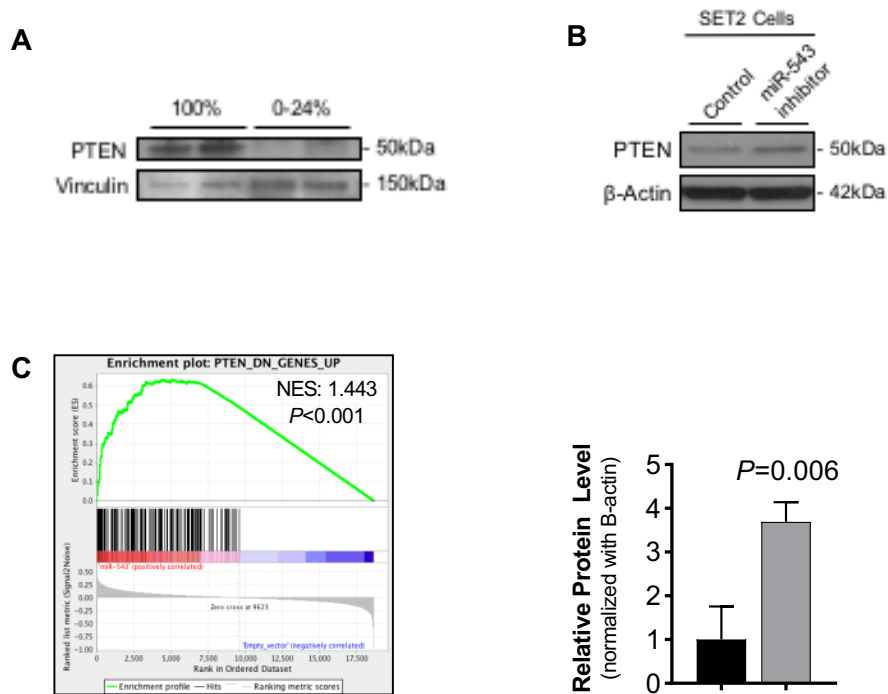

**Supplemental Figure 10. Inhibition of miR-543 induces the increase of PTEN protein levels. (A)** Representative Western blot analysis of PTEN protein in in non-responder patients compared to responder patients. Vinculin protein levels were used as normalizer. **(B)** Representative Western blot analysis of PTEN protein in SET cells stable transfected with scramble miRNA inhibitor (control) or miR-543 inhibitor.  $\beta$ -Actin protein levels were used as normalizer. **(C)** Gene enrichment analysis of genes upregulated when PTEN is down in K562 cells overexpressing miR-543.

**Supplemental Table 1. Demographic data of control patient cohorts.**

|                         | <b>Control Cohort 2</b><br>(n=9) | <b>Control Cohort 3</b><br>(n=7) |
|-------------------------|----------------------------------|----------------------------------|
| <b>Sex</b><br>(M/F)     | 4/5                              | 2/5                              |
| <b>Age</b><br>(mean±SD) | 39.3±6.9                         | 38.4±11.8                        |
|                         |                                  |                                  |

**Supplemental Table 2. Demographic data of MF patient cohort 3.**

| <b>Characteristic</b>                                           | <b>No. (%)</b>   |
|-----------------------------------------------------------------|------------------|
| <b>Patient number</b>                                           | 16 patients      |
| <b>Median age (range), y</b>                                    | 59.46 (38-78)    |
| <b>Sex:</b>                                                     |                  |
| <b>Female</b>                                                   | 7 (43.75)        |
| <b>Male</b>                                                     | 9 (56.25)        |
| <b>Cytogenetics:</b>                                            |                  |
| <b>Abnormal</b>                                                 | 4 (25)           |
| <b>Diploid (normal)</b>                                         | 12 (75)          |
| <b>Overall Response:</b>                                        |                  |
| <b>Clinical Improvement</b>                                     | 12 (75)          |
| <b>No Response</b>                                              | 3 (18.75)        |
| <b>Progressive Disease</b>                                      | 1 (6.25)         |
| <b>Median <i>Jak2</i><sup>V617F</sup> allele burden (range)</b> | 45.8 (0, 92.6)   |
| <b>Median WBC level (range)</b>                                 | 13.1 (3.4, 60.9) |
| <b>Median Hemoglobin level (range)</b>                          | 9.9 (7.5, 16.8)  |
| <b>Median Platelets level (range)</b>                           | 284 (105, 760)   |
| <b>Median PB BL level (range)</b>                               | 0.5 (0, 1.9)     |
| <b>Median Neutrophil level (range)</b>                          | 68.1 (11, 82.5)  |
| <b>Median Monocyte level (range)</b>                            | 5.1 (0, 28)      |
| <b>Median Albumin level (range)</b>                             | 4.41 (3.2, 8.5)  |
| <b>Median time overall survival (range in months)</b>           | 63.1 (9.1-126.8) |

WBC – white blood cells; PB BL – Peripheral Blood Blasts

**Supplemental Table 3. Pathway analyses of the miR-543 predicted targets by at least 6 different algorithms (out of 9 used)\*.**

| <b>Data base</b> | <b>Pathways</b>            | <b>Count</b> | <b>P-value</b> | <b>List Total</b> | <b>Fold Enrichment</b> | <b>FDR</b> |
|------------------|----------------------------|--------------|----------------|-------------------|------------------------|------------|
| REACTOME         | Axon guidance              | 17           | 8.72E-05       | 402               | 2.932                  | 0.089      |
| KEGG             | TGF-beta signaling pathway | 25           | 1.52E-04       | 651               | 2.244                  | 0.187      |
| KEGG             | Adherens junction          | 20           | 0.003          | 651               | 2.028                  | 3.697      |
| REACTOME         | Signaling by BMP           | 9            | 0.003          | 402               | 3.307                  | 3.498      |
| KEGG             | Axon guidance              | 28           | 0.006          | 651               | 1.695                  | 6.978      |

\* - Due to the large number of predicted targets, stringent selection criteria were used - only P values lower than 0.01 and FDR lower than 10% were considered.

**Supplemental Table 4. Gene Set Enrichment Analysis detailed results for miR-543 target gene set presented in Figure 2A.**

| NAME   | GENE SYMBOL | RANK IN GENE LIST | RANK METRIC SCORE | RUNNING ES  | CORE ENRICHMENT |
|--------|-------------|-------------------|-------------------|-------------|-----------------|
| row_0  | MMP7        | 4271              | 0.066273928       | -0.23096986 | No              |
| row_1  | ITGB8       | 4302              | 0.065573774       | -0.22966404 | No              |
| row_2  | C5AR1       | 4305              | 0.06554798        | -0.22682562 | No              |
| row_3  | RRAGA       | 4307              | 0.065529495       | -0.22393326 | No              |
| row_4  | TMEM181     | 4406              | 0.063625053       | -0.22643988 | No              |
| row_5  | ZNF598      | 4438              | 0.062845655       | -0.22531152 | No              |
| row_6  | OSBPL2      | 4510              | 0.061839003       | -0.2264195  | No              |
| row_7  | TRPS1       | 4564              | 0.060790289       | -0.22658865 | No              |
| row_8  | KBTBD11     | 4606              | 0.060034316       | -0.2261345  | No              |
| row_9  | ZNF544      | 4670              | 0.058719922       | -0.22694454 | No              |
| row_10 | SLC24A4     | 4763              | 0.057334814       | -0.22940539 | No              |
| row_11 | FBXL5       | 4776              | 0.057070922       | -0.22749598 | No              |
| row_12 | SPATA5      | 4908              | 0.055115595       | -0.23219293 | No              |
| row_13 | IYD         | 4919              | 0.054894786       | -0.23027185 | No              |
| row_14 | ANKRD50     | 4947              | 0.054515552       | -0.22929902 | No              |
| row_15 | CRHBP       | 4967              | 0.054298699       | -0.22789773 | No              |
| row_16 | ZNF594      | 5009              | 0.053533267       | -0.22773595 | No              |
| row_17 | LIN54       | 5012              | 0.053446274       | -0.2254418  | No              |
| row_18 | SLC10A7     | 5015              | 0.053409971       | -0.22314928 | No              |
| row_19 | VGLL3       | 5030              | 0.053216051       | -0.22152281 | No              |
| row_20 | RNF7        | 5034              | 0.053091783       | -0.21929938 | No              |
| row_21 | RAP2A       | 5091              | 0.052280392       | -0.2200156  | No              |
| row_22 | COL1A2      | 5118              | 0.051794253       | -0.21911038 | No              |
| row_23 | PRRC1       | 5185              | 0.050739329       | -0.22044367 | No              |
| row_24 | MTHFD1L     | 5231              | 0.050025698       | -0.22065875 | No              |
| row_25 | FBXW2       | 5247              | 0.049740724       | -0.21924335 | No              |
| row_26 | STK17B      | 5297              | 0.048989616       | -0.21972413 | No              |
| row_27 | SLC35F1     | 5311              | 0.048732955       | -0.21824451 | No              |
| row_28 | PAG1        | 5354              | 0.048011038       | -0.21838586 | No              |
| row_29 | ELOVL2      | 5363              | 0.047854193       | -0.21667187 | No              |
| row_30 | ABHD12B     | 5365              | 0.047821485       | -0.21457592 | No              |
| row_31 | TRIM61      | 5383              | 0.047579598       | -0.21336725 | No              |
| row_32 | CYR61       | 5401              | 0.047219306       | -0.2121748  | No              |
| row_33 | HSPB3       | 5406              | 0.047147583       | -0.21027349 | No              |
| row_34 | B4GALT6     | 5459              | 0.046521887       | -0.21102959 | No              |
| row_35 | RSBN1       | 5494              | 0.046064302       | -0.21082029 | No              |

|        |          |      |             |             |    |
|--------|----------|------|-------------|-------------|----|
| row_36 | YOD1     | 5631 | 0.04417108  | -0.21628332 | No |
| row_37 | PSG9     | 5635 | 0.044161018 | -0.21446155 | No |
| row_38 | DPY19L4  | 5687 | 0.04352488  | -0.21529765 | No |
| row_39 | VTI1A    | 5693 | 0.043478191 | -0.21361615 | No |
| row_40 | BTRC     | 5709 | 0.043272972 | -0.21249163 | No |
| row_41 | IL1A     | 5784 | 0.042419862 | -0.2146373  | No |
| row_42 | ZNF264   | 5958 | 0.039908763 | -0.22231877 | No |
| row_43 | MFAP3L   | 5998 | 0.039370041 | -0.22268441 | No |
| row_44 | VIP      | 6005 | 0.039180193 | -0.22125097 | No |
| row_45 | FRMD7    | 6105 | 0.037895694 | -0.22496952 | No |
| row_46 | TEX2     | 6201 | 0.036552623 | -0.22852936 | No |
| row_47 | ATM      | 6249 | 0.035874404 | -0.22949044 | No |
| row_48 | SCD5     | 6260 | 0.03571425  | -0.22843198 | No |
| row_49 | KL       | 6303 | 0.035087686 | -0.22915456 | No |
| row_50 | PDXDC1   | 6398 | 0.033901576 | -0.23277885 | No |
| row_51 | ARFGEF2  | 6415 | 0.033718772 | -0.2321388  | No |
| row_52 | GBF1     | 6427 | 0.033527032 | -0.23123349 | No |
| row_53 | ZRANB2   | 6473 | 0.032958012 | -0.23221618 | No |
| row_54 | ADAT2    | 6530 | 0.032239981 | -0.2338337  | No |
| row_55 | FAM24A   | 6551 | 0.031972423 | -0.23349129 | No |
| row_56 | SNAPC3   | 6595 | 0.031468008 | -0.23443143 | No |
| row_57 | SNX1     | 6598 | 0.031435844 | -0.23312719 | No |
| row_58 | TMF1     | 6678 | 0.030599872 | -0.23607832 | No |
| row_59 | PRPF4B   | 6700 | 0.030319352 | -0.23586504 | No |
| row_60 | GALNT3   | 6705 | 0.030303001 | -0.2347213  | No |
| row_61 | CCL22    | 6745 | 0.029802868 | -0.23551722 | No |
| row_62 | KRAS     | 6803 | 0.029249003 | -0.23732403 | No |
| row_63 | GOLGA3   | 6964 | 0.027409751 | -0.24485554 | No |
| row_64 | TNKS     | 6981 | 0.027265074 | -0.24450575 | No |
| row_65 | PCBP1    | 7036 | 0.026737928 | -0.24626116 | No |
| row_66 | MTF2     | 7075 | 0.026305098 | -0.24715962 | No |
| row_67 | CCDC126  | 7085 | 0.026138796 | -0.24647704 | No |
| row_68 | PAK7     | 7110 | 0.025799831 | -0.24663134 | No |
| row_69 | SMAD2    | 7200 | 0.024748757 | -0.2503934  | No |
| row_70 | ZNF654   | 7214 | 0.024630563 | -0.24999775 | No |
| row_71 | ZBTB33   | 7236 | 0.024382859 | -0.25005147 | No |
| row_72 | KIAA1024 | 7259 | 0.024121355 | -0.2501717  | No |
| row_73 | SHQ1     | 7279 | 0.023913886 | -0.25013694 | No |
| row_74 | VBP1     | 7369 | 0.022863721 | -0.2539838  | No |
| row_75 | NMT2     | 7407 | 0.022457546 | -0.2550005  | No |

|         |          |      |             |             |    |
|---------|----------|------|-------------|-------------|----|
| row_76  | HIGD2A   | 7453 | 0.021956146 | -0.25647798 | No |
| row_77  | MED9     | 7472 | 0.021764038 | -0.25648513 | No |
| row_78  | DNAL1    | 7476 | 0.021722473 | -0.2556725  | No |
| row_79  | ATP2B1   | 7510 | 0.021262616 | -0.25652388 | No |
| row_80  | ACYP1    | 7519 | 0.021178216 | -0.2560096  | No |
| row_81  | RPAP2    | 7547 | 0.020966318 | -0.25654563 | No |
| row_82  | METAP1   | 7619 | 0.020179022 | -0.25952724 | No |
| row_83  | ANKFY1   | 7625 | 0.020105876 | -0.2588969  | No |
| row_84  | GK5      | 7637 | 0.020007299 | -0.2585996  | No |
| row_85  | CGGBP1   | 7675 | 0.019552635 | -0.25974697 | No |
| row_86  | MRPS23   | 7913 | 0.016852103 | -0.2719711  | No |
| row_87  | IFT80    | 7917 | 0.016829016 | -0.27137855 | No |
| row_88  | BAZ2B    | 7942 | 0.016490156 | -0.27195156 | No |
| row_89  | RBM47    | 7975 | 0.016121589 | -0.27297935 | No |
| row_90  | TXLNA    | 8012 | 0.015723297 | -0.27424416 | No |
| row_91  | ANKRD13C | 8015 | 0.015706833 | -0.2736473  | No |
| row_92  | UBA6     | 8046 | 0.015413055 | -0.27459744 | No |
| row_93  | PCYOX1   | 8229 | 0.01355424  | -0.28395715 | No |
| row_94  | ZDHHC17  | 8318 | 0.012464057 | -0.28821692 | No |
| row_95  | ZFAND5   | 8461 | 0.01112519  | -0.29549485 | No |
| row_96  | ZFX      | 8500 | 0.010768116 | -0.29709208 | No |
| row_97  | NFAT5    | 8504 | 0.010749063 | -0.29677296 | No |
| row_98  | PDIA6    | 8522 | 0.010623191 | -0.2972264  | No |
| row_99  | HPS5     | 8587 | 0.010045631 | -0.3002803  | No |
| row_100 | LRRK2    | 8665 | 0.009208149 | -0.30408397 | No |
| row_101 | TAF5     | 8670 | 0.00916417  | -0.3038909  | No |
| row_102 | FAM46C   | 8702 | 0.008796202 | -0.3051934  | No |
| row_103 | LAMA3    | 8737 | 0.008481756 | -0.30667433 | No |
| row_104 | HECA     | 8762 | 0.008234319 | -0.30761865 | No |
| row_105 | RIT1     | 8793 | 0.007859119 | -0.30890846 | No |
| row_106 | ACTL6A   | 8853 | 0.007485058 | -0.31180364 | No |
| row_107 | CRH      | 8883 | 0.007221948 | -0.31306738 | No |
| row_108 | THUMPD1  | 8899 | 0.007064102 | -0.3135713  | No |
| row_109 | SOCS4    | 8953 | 0.006543251 | -0.3161802  | No |
| row_110 | DYNC1L12 | 9006 | 0.006020536 | -0.3187578  | No |
| row_111 | PPP1CB   | 9033 | 0.005629041 | -0.31992882 | No |
| row_112 | PRKAR2B  | 9112 | 0.004827473 | -0.3239843  | No |
| row_113 | RBM38    | 9161 | 0.004360496 | -0.32641745 | No |
| row_114 | EEF1A1   | 9221 | 0.003786441 | -0.32947898 | No |
| row_115 | NPTN     | 9246 | 0.003537315 | -0.3306345  | No |

|         |            |       |              |             |    |
|---------|------------|-------|--------------|-------------|----|
| row_116 | SP3        | 9247  | 0.003532705  | -0.33047563 | No |
| row_117 | IQGAP1     | 9281  | 0.003115994  | -0.33214313 | No |
| row_118 | FIGNL1     | 9330  | 0.002731805  | -0.33464953 | No |
| row_119 | FOXJ2      | 9365  | 0.002431904  | -0.33640257 | No |
| row_120 | FBXO11     | 9380  | 0.002334684  | -0.33706445 | No |
| row_121 | SLC2A3     | 9391  | 0.002255244  | -0.33751076 | No |
| row_122 | YTHDC1     | 9393  | 0.002239789  | -0.3374648  | No |
| row_123 | NOL4       | 9410  | 0.002099956  | -0.3382468  | No |
| row_124 | ST6GALNAC5 | 9417  | 0.002058557  | -0.3384829  | No |
| row_125 | UTY        | 9442  | 0.001799164  | -0.33971658 | No |
| row_126 | HMGB2      | 9454  | 0.001710556  | -0.3402422  | No |
| row_127 | AGL        | 9456  | 0.001695529  | -0.34022072 | No |
| row_128 | PDIK1L     | 9473  | 0.001587766  | -0.34102574 | No |
| row_129 | WHSC1      | 9488  | 0.001505605  | -0.3417249  | No |
| row_130 | SPTLC1     | 9555  | 7.70E-04     | -0.34530553 | No |
| row_131 | ERLIN1     | 9596  | 8.23E-08     | -0.34749657 | No |
| row_132 | STXBP4     | 9621  | 4.85E-08     | -0.3488112  | No |
| row_133 | HERPUD1    | 9696  | -6.89E-08    | -0.35286468 | No |
| row_134 | ENOX2      | 9743  | -8.57E-04    | -0.35534585 | No |
| row_135 | KIF3A      | 9774  | -0.00117955  | -0.3569361  | No |
| row_136 | RBBP7      | 9782  | -0.001302792 | -0.35726094 | No |
| row_137 | TRAPPC6B   | 9802  | -0.001517413 | -0.35823345 | No |
| row_138 | PCDH11Y    | 9915  | -0.002506263 | -0.3642557  | No |
| row_139 | PRDX3      | 9918  | -0.002550428 | -0.36425054 | No |
| row_140 | MAPK1      | 9955  | -0.002822583 | -0.36609557 | No |
| row_141 | BIRC6      | 9977  | -0.003033058 | -0.36710945 | No |
| row_142 | ZCCHC14    | 9985  | -0.003184009 | -0.3673497  | No |
| row_143 | ARHGAP18   | 9990  | -0.003228673 | -0.3674236  | No |
| row_144 | ARL5A      | 10014 | -0.003450735 | -0.36852828 | No |
| row_145 | DTX4       | 10120 | -0.004528927 | -0.37407613 | No |
| row_146 | ID4        | 10143 | -0.004721468 | -0.37506884 | No |
| row_147 | KLHL24     | 10171 | -0.004973589 | -0.37632415 | No |
| row_148 | ACBD3      | 10244 | -0.005521351 | -0.38001972 | No |
| row_149 | MEGF9      | 10247 | -0.005546306 | -0.37987983 | No |
| row_150 | TRAK2      | 10262 | -0.005688304 | -0.38039088 | No |
| row_151 | HNRNPC     | 10267 | -0.005714317 | -0.380353   | No |
| row_152 | MTCH2      | 10269 | -0.005746458 | -0.38014933 | No |
| row_153 | HBS1L      | 10304 | -0.006037783 | -0.38174018 | No |
| row_154 | ITLN1      | 10344 | -0.00641294  | -0.38358805 | No |
| row_155 | NR3C1      | 10355 | -0.00649772  | -0.3838436  | No |

|         |         |       |              |             |    |
|---------|---------|-------|--------------|-------------|----|
| row_156 | GREM1   | 10412 | -0.007092192 | -0.3865921  | No |
| row_157 | SNX30   | 10452 | -0.007442649 | -0.38839367 | No |
| row_158 | MRPS9   | 10467 | -0.007591891 | -0.3888191  | No |
| row_159 | FUT9    | 10479 | -0.007664786 | -0.38907692 | No |
| row_160 | MRPL19  | 10495 | -0.007818601 | -0.38954693 | No |
| row_161 | SPG21   | 10528 | -0.008153822 | -0.39093307 | No |
| row_162 | NOLC1   | 10607 | -0.009019763 | -0.39479998 | No |
| row_163 | CLEC12A | 10701 | -0.009908782 | -0.39944854 | No |
| row_164 | DDO     | 10723 | -0.010166725 | -0.40014163 | No |
| row_165 | PLD1    | 10735 | -0.010260876 | -0.40028268 | No |
| row_166 | CUL4B   | 10794 | -0.010857075 | -0.40297145 | No |
| row_167 | MEIS2   | 10848 | -0.011353017 | -0.405364   | No |
| row_168 | TIAL1   | 10880 | -0.011775685 | -0.40653247 | No |
| row_169 | PCSK1   | 10940 | -0.012394693 | -0.40920684 | No |
| row_170 | TCERG1  | 10944 | -0.012428584 | -0.4088122  | No |
| row_171 | TFRC    | 10978 | -0.012801934 | -0.41004407 | No |
| row_172 | NRCAM   | 10987 | -0.012872455 | -0.40990335 | No |
| row_173 | FBXO5   | 10991 | -0.012900294 | -0.40948752 | No |
| row_174 | CPSF6   | 11029 | -0.013283332 | -0.41091684 | No |
| row_175 | RBM8A   | 11036 | -0.013382137 | -0.41064364 | No |
| row_176 | SMC4    | 11042 | -0.013477089 | -0.4103114  | No |
| row_177 | KIN     | 11096 | -0.014073988 | -0.4125816  | No |
| row_178 | GDAP2   | 11110 | -0.014159514 | -0.41265687 | No |
| row_179 | PMPCB   | 11128 | -0.014384021 | -0.41294116 | No |
| row_180 | NKIRAS1 | 11129 | -0.014386981 | -0.41229412 | No |
| row_181 | ATG5    | 11193 | -0.014995027 | -0.41507065 | No |
| row_182 | GDA     | 11233 | -0.015420094 | -0.41651344 | No |
| row_183 | PAPD5   | 11245 | -0.015485523 | -0.41641954 | No |
| row_184 | ADAM9   | 11370 | -0.017003721 | -0.4224471  | No |
| row_185 | TIFA    | 11435 | -0.017689914 | -0.4251572  | No |
| row_186 | TBC1D1  | 11477 | -0.018091397 | -0.42658937 | No |
| row_187 | FNBP1   | 11478 | -0.018102806 | -0.42577523 | No |
| row_188 | ATP6V1A | 11480 | -0.01811     | -0.4250155  | No |
| row_189 | TRIM9   | 11514 | -0.01848427  | -0.42599183 | No |
| row_190 | LCP1    | 11529 | -0.018609017 | -0.42592177 | No |
| row_191 | NOS3    | 11665 | -0.020080302 | -0.43241352 | No |
| row_192 | RUFY2   | 11696 | -0.020333817 | -0.4331423  | No |
| row_193 | CD2AP   | 11713 | -0.020501247 | -0.4330967  | No |
| row_194 | METTL9  | 11758 | -0.020904534 | -0.4345667  | No |
| row_195 | ZNF518B | 11809 | -0.021622555 | -0.43633306 | No |

|         |          |       |              |             |    |
|---------|----------|-------|--------------|-------------|----|
| row_196 | TGFBI    | 11816 | -0.021668388 | -0.4356872  | No |
| row_197 | AKAP11   | 11852 | -0.022100287 | -0.43661046 | No |
| row_198 | CEBPG    | 11885 | -0.02244037  | -0.43735406 | No |
| row_199 | CMPK1    | 11912 | -0.022700764 | -0.4377573  | No |
| row_200 | ZDHHC3   | 11919 | -0.022779083 | -0.4370615  | No |
| row_201 | SLC25A40 | 11941 | -0.022995161 | -0.4371776  | No |
| row_202 | PHC3     | 11969 | -0.023453511 | -0.43760177 | No |
| row_203 | MAPRE1   | 12000 | -0.023792507 | -0.43817502 | No |
| row_204 | GNA12    | 12017 | -0.023969319 | -0.43797344 | No |
| row_205 | SEL1L    | 12028 | -0.024084069 | -0.43743804 | No |
| row_206 | PTEN     | 12032 | -0.024189996 | -0.43651444 | No |
| row_207 | IREB2    | 12071 | -0.024509884 | -0.43749365 | No |
| row_208 | GHITM    | 12122 | -0.025147101 | -0.4391015  | No |
| row_209 | TET2     | 12144 | -0.025401244 | -0.4391094  | No |
| row_210 | AMFR     | 12169 | -0.025633233 | -0.4392712  | No |
| row_211 | CREBL2   | 12172 | -0.025693828 | -0.4382252  | No |
| row_212 | AHCTF1   | 12189 | -0.025837913 | -0.43793958 | No |
| row_213 | NUFIP1   | 12244 | -0.026478404 | -0.43970668 | No |
| row_214 | EN2      | 12288 | -0.026973981 | -0.44084895 | No |
| row_215 | FAM117A  | 12290 | -0.026982125 | -0.4396902  | No |
| row_216 | SMAD5    | 12291 | -0.026999172 | -0.43847594 | No |
| row_217 | DDX3X    | 12339 | -0.027410135 | -0.4398177  | No |
| row_218 | BRD1     | 12354 | -0.027502749 | -0.43934765 | No |
| row_219 | SYNE1    | 12363 | -0.027573504 | -0.43854576 | No |
| row_220 | SKAP2    | 12376 | -0.027733084 | -0.4379558  | No |
| row_221 | PIP4K2C  | 12409 | -0.028237261 | -0.4384387  | No |
| row_222 | CUL3     | 12435 | -0.028514441 | -0.4385257  | No |
| row_223 | RRP15    | 12454 | -0.028674854 | -0.43822205 | No |
| row_224 | EEA1     | 12531 | -0.029626979 | -0.44105262 | No |
| row_225 | FNDC3B   | 12593 | -0.030224027 | -0.44303468 | No |
| row_226 | ZNF398   | 12603 | -0.030345442 | -0.44216293 | No |
| row_227 | RPS6KA5  | 12627 | -0.030553861 | -0.44204864 | No |
| row_228 | JAZF1    | 12699 | -0.031553425 | -0.4445187  | No |
| row_229 | FAM104B  | 12780 | -0.032702919 | -0.44743    | No |
| row_230 | ONECUT2  | 12805 | -0.033112552 | -0.44725543 | No |
| row_231 | SDAD1    | 12813 | -0.033155415 | -0.44614774 | No |
| row_232 | FZD4     | 12831 | -0.033349182 | -0.44557908 | No |
| row_233 | CAPRIN1  | 12858 | -0.033726782 | -0.44548646 | No |
| row_234 | RHOQ     | 12883 | -0.034002088 | -0.44527188 | No |
| row_235 | MAL2     | 12927 | -0.034662116 | -0.44606835 | No |

|         |         |       |              |             |     |
|---------|---------|-------|--------------|-------------|-----|
| row_236 | FAM102B | 12996 | -0.035470702 | -0.4481979  | No  |
| row_237 | HEY2    | 13029 | -0.035853863 | -0.44833824 | No  |
| row_238 | OSBPL8  | 13098 | -0.036910124 | -0.45040303 | No  |
| row_239 | LAMP2   | 13134 | -0.037252188 | -0.45064482 | Yes |
| row_240 | CYB5R4  | 13137 | -0.037282582 | -0.44907764 | Yes |
| row_241 | DYNLRB1 | 13161 | -0.037867717 | -0.44863442 | Yes |
| row_242 | VTA1    | 13219 | -0.038718287 | -0.45001537 | Yes |
| row_243 | OSBPL3  | 13249 | -0.039037127 | -0.4498482  | Yes |
| row_244 | ACVR2B  | 13260 | -0.039232694 | -0.44863153 | Yes |
| row_245 | ARL5B   | 13291 | -0.03968839  | -0.44848987 | Yes |
| row_246 | RNF6    | 13313 | -0.040023714 | -0.44784015 | Yes |
| row_247 | DLX1    | 13320 | -0.040135171 | -0.44636375 | Yes |
| row_248 | CHML    | 13383 | -0.040983643 | -0.4479167  | Yes |
| row_249 | METTL10 | 13425 | -0.041537806 | -0.4482944  | Yes |
| row_250 | TNPO1   | 13437 | -0.041705292 | -0.44702128 | Yes |
| row_251 | DDX46   | 13447 | -0.041798852 | -0.4456344  | Yes |
| row_252 | SIAE    | 13516 | -0.042798664 | -0.44743437 | Yes |
| row_253 | TMOD3   | 13537 | -0.043019697 | -0.44659513 | Yes |
| row_254 | TMEM135 | 13558 | -0.043342579 | -0.44574136 | Yes |
| row_255 | ATXN3   | 13570 | -0.043478318 | -0.44438848 | Yes |
| row_256 | CTNNA1  | 13581 | -0.043610137 | -0.44297493 | Yes |
| row_257 | UBE2W   | 13585 | -0.043671798 | -0.44117516 | Yes |
| row_258 | RNF125  | 13598 | -0.043811634 | -0.43986207 | Yes |
| row_259 | GRAMD4  | 13691 | -0.045072146 | -0.44287443 | Yes |
| row_260 | ATXN1   | 13723 | -0.045422822 | -0.44252965 | Yes |
| row_261 | CREBBP  | 13757 | -0.045884807 | -0.44227365 | Yes |
| row_262 | RNF2    | 13762 | -0.045955911 | -0.44042593 | Yes |
| row_263 | MTA1    | 13784 | -0.046296291 | -0.4394941  | Yes |
| row_264 | COX11   | 13857 | -0.047498371 | -0.4413018  | Yes |
| row_265 | FAM102A | 13948 | -0.048770148 | -0.4440383  | Yes |
| row_266 | SRFBP1  | 13963 | -0.049067747 | -0.44259837 | Yes |
| row_267 | NAPB    | 13976 | -0.049309663 | -0.44103804 | Yes |
| row_268 | EVI5    | 13983 | -0.049375881 | -0.43914604 | Yes |
| row_269 | PJA2    | 13993 | -0.049518764 | -0.43741196 | Yes |
| row_270 | PBX3    | 13997 | -0.049577583 | -0.4353466  | Yes |
| row_271 | NFXL1   | 14113 | -0.051470656 | -0.43933105 | Yes |
| row_272 | RTF1    | 14138 | -0.051903095 | -0.43831137 | Yes |
| row_273 | RAB3IP  | 14152 | -0.052137595 | -0.43667862 | Yes |
| row_274 | POLR3G  | 14201 | -0.052850429 | -0.43693098 | Yes |
| row_275 | CYP26B1 | 14210 | -0.053055156 | -0.4349831  | Yes |

|         |         |       |              |             |     |
|---------|---------|-------|--------------|-------------|-----|
| row_276 | MTL5    | 14242 | -0.053603355 | -0.4342704  | Yes |
| row_277 | ARRDC4  | 14252 | -0.05382866  | -0.4323425  | Yes |
| row_278 | CCDC88C | 14267 | -0.054176074 | -0.43067282 | Yes |
| row_279 | HK2     | 14281 | -0.054359861 | -0.42894015 | Yes |
| row_280 | RABGEF1 | 14285 | -0.054389462 | -0.42665833 | Yes |
| row_281 | ZNF644  | 14340 | -0.055142071 | -0.4271363  | Yes |
| row_282 | ZZZ3    | 14374 | -0.055852324 | -0.426432   | Yes |
| row_283 | FBXO34  | 14386 | -0.056044877 | -0.424514   | Yes |
| row_284 | SLAIN2  | 14392 | -0.056153014 | -0.42226243 | Yes |
| row_285 | LMO3    | 14457 | -0.057289649 | -0.42319158 | Yes |
| row_286 | TMEM133 | 14547 | -0.058902789 | -0.42541757 | Yes |
| row_287 | SMC6    | 14587 | -0.059812032 | -0.42486387 | Yes |
| row_288 | WASL    | 14597 | -0.060060076 | -0.4226557  | Yes |
| row_289 | TNFSF11 | 14627 | -0.060553677 | -0.42152086 | Yes |
| row_290 | MAP1B   | 14642 | -0.060734294 | -0.41955626 | Yes |
| row_291 | PCGF3   | 14697 | -0.061855692 | -0.4197323  | Yes |
| row_292 | NAP1L2  | 14716 | -0.062240668 | -0.41791904 | Yes |
| row_293 | MTX2    | 14730 | -0.062407143 | -0.4158244  | Yes |
| row_294 | CHCHD7  | 14760 | -0.062999032 | -0.41457963 | Yes |
| row_295 | PRTG    | 14789 | -0.063542478 | -0.4132556  | Yes |
| row_296 | CHN1    | 14852 | -0.06464728  | -0.41374427 | Yes |
| row_297 | FMNL2   | 14887 | -0.065255709 | -0.41267186 | Yes |
| row_298 | NCK2    | 14888 | -0.06526953  | -0.4097364  | Yes |
| row_299 | ATP11B  | 14902 | -0.065470897 | -0.407504   | Yes |
| row_300 | GOPC    | 14931 | -0.065947324 | -0.4060718  | Yes |
| row_301 | EEF1E1  | 14954 | -0.066270262 | -0.40429646 | Yes |
| row_302 | LARP4   | 15010 | -0.067343049 | -0.40428045 | Yes |
| row_303 | CER1    | 15046 | -0.068172902 | -0.4031316  | Yes |
| row_304 | MED10   | 15093 | -0.068978563 | -0.4025491  | Yes |
| row_305 | RNF13   | 15120 | -0.069754012 | -0.40083614 | Yes |
| row_306 | ZNF649  | 15172 | -0.070826605 | -0.4004444  | Yes |
| row_307 | MZT1    | 15248 | -0.07211864  | -0.40130913 | Yes |
| row_308 | HOOK1   | 15438 | -0.076548375 | -0.4082192  | Yes |
| row_309 | IGFBP3  | 15451 | -0.076750249 | -0.40542474 | Yes |
| row_310 | ING5    | 15461 | -0.077092543 | -0.40245056 | Yes |
| row_311 | KCNA1   | 15484 | -0.0776053   | -0.4001654  | Yes |
| row_312 | PER3    | 15518 | -0.078226939 | -0.39845482 | Yes |
| row_313 | PTPDC1  | 15520 | -0.078236133 | -0.394991   | Yes |
| row_314 | CCDC117 | 15524 | -0.078369923 | -0.3916307  | Yes |
| row_315 | USP53   | 15613 | -0.080675393 | -0.3928227  | Yes |

|         |          |       |              |             |     |
|---------|----------|-------|--------------|-------------|-----|
| row_316 | SH3GLB1  | 15645 | -0.081479229 | -0.39085633 | Yes |
| row_317 | ZBTB34   | 15650 | -0.081589505 | -0.38740602 | Yes |
| row_318 | SEMA3E   | 15697 | -0.082846038 | -0.3861998  | Yes |
| row_319 | LYPD6    | 15783 | -0.085561544 | -0.38700774 | Yes |
| row_320 | SIRT1    | 15817 | -0.086595878 | -0.3849208  | Yes |
| row_321 | PSIP1    | 15820 | -0.0868055   | -0.38112634 | Yes |
| row_322 | DCUN1D1  | 15861 | -0.088149592 | -0.37935296 | Yes |
| row_323 | PGBD1    | 15907 | -0.089169122 | -0.3778076  | Yes |
| row_324 | STK24    | 15939 | -0.090106703 | -0.37545317 | Yes |
| row_325 | TRDMT1   | 16016 | -0.092470296 | -0.3754574  | Yes |
| row_326 | AK3      | 16058 | -0.093805857 | -0.3734844  | Yes |
| row_327 | RABL3    | 16115 | -0.095641866 | -0.37225047 | Yes |
| row_328 | CAND1    | 16121 | -0.095909022 | -0.36821094 | Yes |
| row_329 | HS3ST3A1 | 16139 | -0.096660696 | -0.3647949  | Yes |
| row_330 | MCM10    | 16160 | -0.097206689 | -0.36151865 | Yes |
| row_331 | PTK2     | 16249 | -0.099553026 | -0.36186165 | Yes |
| row_332 | WNT16    | 16262 | -0.100174226 | -0.35801372 | Yes |
| row_333 | CPEB2    | 16297 | -0.10110306  | -0.3553291  | Yes |
| row_334 | LZTFL1   | 16303 | -0.101330854 | -0.3510457  | Yes |
| row_335 | VANGL1   | 16313 | -0.101493672 | -0.3469741  | Yes |
| row_336 | PABPC5   | 16321 | -0.101645708 | -0.3427861  | Yes |
| row_337 | STYX     | 16323 | -0.101710916 | -0.33826652 | Yes |
| row_338 | KCNG3    | 16355 | -0.102925211 | -0.3353356  | Yes |
| row_339 | BEX2     | 16379 | -0.103872783 | -0.33192387 | Yes |
| row_340 | SF3B1    | 16380 | -0.103890009 | -0.3272515  | Yes |
| row_341 | SCAMP1   | 16426 | -0.105507895 | -0.32497132 | Yes |
| row_342 | SLC25A21 | 16468 | -0.107161567 | -0.32239765 | Yes |
| row_343 | HMGA2    | 16488 | -0.107913673 | -0.31858507 | Yes |
| row_344 | ENAH     | 16517 | -0.109257087 | -0.31520507 | Yes |
| row_345 | ESCO2    | 16524 | -0.109777153 | -0.3105966  | Yes |
| row_346 | FKBP4    | 16664 | -0.115234099 | -0.31302795 | Yes |
| row_347 | TMEM106B | 16679 | -0.115719311 | -0.30859044 | Yes |
| row_348 | PDE5A    | 16688 | -0.116377525 | -0.30379468 | Yes |
| row_349 | SS18L1   | 16727 | -0.117633849 | -0.3005857  | Yes |
| row_350 | MRGPRX2  | 16794 | -0.121025153 | -0.29875794 | Yes |
| row_351 | DDX52    | 16815 | -0.121951215 | -0.2943688  | Yes |
| row_352 | PDS5B    | 16845 | -0.123433277 | -0.29040602 | Yes |
| row_353 | ARHGAP26 | 16855 | -0.123825774 | -0.28533006 | Yes |
| row_354 | NRXN3    | 16880 | -0.125059038 | -0.28102025 | Yes |
| row_355 | ING1     | 16893 | -0.125836998 | -0.27601817 | Yes |

|         |          |       |              |              |     |
|---------|----------|-------|--------------|--------------|-----|
| row_356 | WASF1    | 16947 | -0.128667012 | -0.27313462  | Yes |
| row_357 | FBXL3    | 16981 | -0.130577728 | -0.2690696   | Yes |
| row_358 | ACVR2A   | 16996 | -0.131259158 | -0.2639332   | Yes |
| row_359 | ATRNL1   | 17006 | -0.131723389 | -0.25850204  | Yes |
| row_360 | ZBTB24   | 17012 | -0.131863356 | -0.2528455   | Yes |
| row_361 | NEBL     | 17016 | -0.132165179 | -0.2470658   | Yes |
| row_362 | SLC38A1  | 17041 | -0.133503616 | -0.24237621  | Yes |
| row_363 | PLA2G4A  | 17083 | -0.135435998 | -0.23853093  | Yes |
| row_364 | TET1     | 17169 | -0.140622199 | -0.23686257  | Yes |
| row_365 | ATG2B    | 17186 | -0.14121893  | -0.23138778  | Yes |
| row_366 | DDX60    | 17240 | -0.144404367 | -0.22779647  | Yes |
| row_367 | REPS2    | 17284 | -0.14669317  | -0.22355445  | Yes |
| row_368 | MAF      | 17303 | -0.147826001 | -0.21789208  | Yes |
| row_369 | NR1D2    | 17304 | -0.147834107 | -0.21124336  | Yes |
| row_370 | TWISTNB  | 17323 | -0.149266362 | -0.2055162   | Yes |
| row_371 | PPP1R3D  | 17342 | -0.149965852 | -0.19975759  | Yes |
| row_372 | PTPRB    | 17351 | -0.150679603 | -0.1934191   | Yes |
| row_373 | UNC13C   | 17353 | -0.150871187 | -0.18668857  | Yes |
| row_374 | AKAP7    | 17414 | -0.155569389 | -0.18297856  | Yes |
| row_375 | KITLG    | 17436 | -0.157045841 | -0.17706585  | Yes |
| row_376 | PLAG1    | 17543 | -0.16343832  | -0.17552166  | Yes |
| row_377 | MSR1     | 17750 | -0.182868138 | -0.17858128  | Yes |
| row_378 | MAP7     | 17806 | -0.188199326 | -0.17312987  | Yes |
| row_379 | CASK     | 18101 | -0.223535433 | -0.17918085  | Yes |
| row_380 | PCDH11X  | 18130 | -0.228267595 | -0.17044844  | Yes |
| row_381 | PGR      | 18151 | -0.232135624 | -0.16110386  | Yes |
| row_382 | PDAP1    | 18182 | -0.237499982 | -0.15206578  | Yes |
| row_383 | PROCR    | 18217 | -0.2461707   | -0.14285687  | Yes |
| row_384 | PTGER3   | 18237 | -0.249951288 | -0.13265626  | Yes |
| row_385 | RTKN2    | 18320 | -0.269377857 | -0.12503289  | Yes |
| row_386 | SLC30A10 | 18406 | -0.296650708 | -0.11634726  | Yes |
| row_387 | CREB5    | 18471 | -0.320205748 | -0.105451964 | Yes |
| row_388 | EPS8     | 18491 | -0.331744045 | -0.091572806 | Yes |
| row_389 | SERPINB5 | 18497 | -0.337338209 | -0.07667518  | Yes |
| row_390 | ABCA1    | 18515 | -0.349162012 | -0.061903097 | Yes |
| row_391 | ZDHHC21  | 18547 | -0.369163871 | -0.046998326 | Yes |
| row_392 | TWIST1   | 18631 | -0.582096994 | -0.025365438 | Yes |
| row_393 | NTS      | 18633 | -0.584699512 | 8.76E-04     | Yes |

**Supplemental Table 5. Gene Set Enrichment Analysis detailed results for drug/xenobiotics metabolism gene set presented in Figure 2A.**

| NAME   | GENE SYMBOL   | RANK IN GENE LIST | RANK METRIC SCORE | RUNNING ES | CORE ENRICHMENT |
|--------|---------------|-------------------|-------------------|------------|-----------------|
| row_0  | GSTA1         | 304               | 0.265217513       | 0.03593513 | Yes             |
| row_1  | ADH4          | 334               | 0.259445846       | 0.08552915 | Yes             |
| row_2  | GSTO2         | 477               | 0.236348689       | 0.12448898 | Yes             |
| row_3  | GSTA3         | 513               | 0.231816232       | 0.16831248 | Yes             |
| row_4  | ITPA          | 595               | 0.218738571       | 0.20708238 | Yes             |
| row_5  | XDH           | 613               | 0.216563568       | 0.24886706 | Yes             |
| row_6  | CYP2B6        | 650               | 0.212560475       | 0.28884014 | Yes             |
| row_7  | GSTM3         | 804               | 0.196622342       | 0.31937534 | Yes             |
| row_8  | CYP2F1        | 1103              | 0.173201293       | 0.33749065 | Yes             |
| row_9  | ADH1B         | 1311              | 0.15959768        | 0.35782018 | Yes             |
| row_10 | UGT2B17       | 1393              | 0.154682279       | 0.38396022 | Yes             |
| row_11 | UGT2B15       | 1464              | 0.151382148       | 0.41004145 | Yes             |
| row_12 | UPB1          | 1795              | 0.136071235       | 0.41911408 | Yes             |
| row_13 | DHDH          | 1854              | 0.133570775       | 0.4423292  | Yes             |
| row_14 | CYP2C9        | 1899              | 0.131782949       | 0.46594507 | Yes             |
| row_15 | CYP2D6        | 1969              | 0.129297212       | 0.48772568 | Yes             |
| row_16 | DPYS          | 2156              | 0.122295387       | 0.50183034 | Yes             |
| row_17 | MGST2         | 2178              | 0.121293791       | 0.52461565 | Yes             |
| row_18 | UPP2          | 2397              | 0.113011569       | 0.535168   | Yes             |
| row_19 | UGT2B10       | 2424              | 0.112107717       | 0.5558731  | Yes             |
| row_20 | UMPS          | 2606              | 0.106108189       | 0.56705517 | Yes             |
| row_21 | MAOA          | 2935              | 0.096246414       | 0.5683833  | Yes             |
| row_22 | <b>CYP3A4</b> | 2997              | 0.094532423       | 0.5837398  | Yes             |
| row_23 | TK2           | 3565              | 0.080058262       | 0.5690163  | No              |
| row_24 | ADH7          | 4666              | 0.058823526       | 0.52142686 | No              |
| row_25 | GSTZ1         | 4938              | 0.054624885       | 0.5176155  | No              |
| row_26 | MGST3         | 5056              | 0.052741271       | 0.521719   | No              |
| row_27 | GSTK1         | 5100              | 0.052145213       | 0.5296867  | No              |
| row_28 | GSTM5         | 5343              | 0.0482115         | 0.52617115 | No              |
| row_29 | GSTP1         | 5408              | 0.047128487       | 0.5320198  | No              |
| row_30 | ADH5          | 5412              | 0.047096804       | 0.5411443  | No              |
| row_31 | FMO3          | 5436              | 0.046801921       | 0.5491346  | No              |
| row_32 | CYP2A7        | 5568              | 0.044851094       | 0.5509291  | No              |
| row_33 | GSTM4         | 5572              | 0.04480584        | 0.55960196 | No              |
| row_34 | GSTA4         | 5662              | 0.043820024       | 0.5634531  | No              |
| row_35 | NAT2          | 5840              | 0.041551273       | 0.56212187 | No              |
| row_36 | TK1           | 5985              | 0.039543666       | 0.5621704  | No              |
| row_37 | UPP1          | 6137              | 0.037505042       | 0.56144035 | No              |
| row_38 | UCK1          | 6584              | 0.031542808       | 0.5436618  | No              |
| row_39 | CYP2C19       | 7046              | 0.026658813       | 0.52411306 | No              |
| row_40 | FMO1          | 7144              | 0.025380753       | 0.52389807 | No              |
| row_41 | ADH6          | 7179              | 0.0249252         | 0.5269831  | No              |
| row_42 | UGT2B7        | 7366              | 0.022893751       | 0.52148896 | No              |
| row_43 | MAOB          | 7776              | 0.018395862       | 0.50310904 | No              |

|        |         |       |              |            |    |
|--------|---------|-------|--------------|------------|----|
| row_44 | ALDH3B2 | 8493  | 0.010877524  | 0.46672803 | No |
| row_45 | IMPDH1  | 9230  | 0.003700959  | 0.4278559  | No |
| row_46 | GSTM2   | 9756  | -9.76E-04    | 0.39979967 | No |
| row_47 | CYP2E1  | 9933  | -0.002675161 | 0.39085713 | No |
| row_48 | GMPS    | 10074 | -0.004115209 | 0.38413557 | No |
| row_49 | NAT1    | 10321 | -0.006200953 | 0.37212172 | No |
| row_50 | FMO2    | 10972 | -0.012722735 | 0.3396558  | No |
| row_51 | TPMT    | 11006 | -0.013040002 | 0.34045124 | No |
| row_52 | IMPDH2  | 11226 | -0.015343071 | 0.3316927  | No |
| row_53 | CYP3A5  | 11503 | -0.018402312 | 0.32047036 | No |
| row_54 | GUSB    | 11606 | -0.019474179 | 0.31882176 | No |
| row_55 | UGT2B4  | 11670 | -0.020109713 | 0.3193969  | No |
| row_56 | AKR1C4  | 11697 | -0.020358335 | 0.32201195 | No |
| row_57 | CYP3A43 | 11717 | -0.020512862 | 0.32503408 | No |
| row_58 | GSTO1   | 11832 | -0.021821795 | 0.32320267 | No |
| row_59 | DPYD    | 12011 | -0.023923423 | 0.318342   | No |
| row_60 | ALDH1A3 | 12279 | -0.026891377 | 0.30927768 | No |
| row_61 | CES1    | 13085 | -0.036635872 | 0.2731866  | No |
| row_62 | CYP2C18 | 13415 | -0.041450739 | 0.2636569  | No |
| row_63 | CYP2C8  | 13688 | -0.04504507  | 0.2579029  | No |
| row_64 | HPRT1   | 13730 | -0.045539983 | 0.26467586 | No |

**Supplemental Table 6. Gene Set Enrichment Analysis detailed results for DNA replication gene set presented in Figure 2A.**

| NAME   | GENE SYMBOL | RANK IN GENE LIST | RANK METRIC SCORE | RUNNING ES   | CORE ENRICHMENT |
|--------|-------------|-------------------|-------------------|--------------|-----------------|
| row_0  | RPA4        | 266               | 0.272727251       | 0.02242821   | No              |
| row_1  | PSMB9       | 925               | 0.187001824       | 0.012060368  | No              |
| row_2  | B9D2        | 1333              | 0.158392459       | 0.011416669  | No              |
| row_3  | E2F1        | 1361              | 0.156718403       | 0.031117478  | No              |
| row_4  | PPP2R5B     | 1975              | 0.129115507       | 0.01536897   | No              |
| row_5  | CENPT       | 2186              | 0.121002682       | 0.020340571  | No              |
| row_6  | PSMA8       | 2449              | 0.111216284       | 0.021175751  | No              |
| row_7  | CCNA1       | 2625              | 0.105502635       | 0.02594897   | No              |
| row_8  | POLD1       | 2740              | 0.10214375        | 0.033570737  | No              |
| row_9  | PPP2CB      | 3047              | 0.093345359       | 0.02961087   | No              |
| row_10 | PSMD9       | 3285              | 0.087219782       | 0.02855902   | No              |
| row_11 | PSMB10      | 3469              | 0.082789868       | 0.029832164  | No              |
| row_12 | CENPM       | 4174              | 0.068262622       | 9.40E-04     | No              |
| row_13 | PSMB6       | 4749              | 0.057600427       | -0.022354024 | No              |
| row_14 | POLD4       | 5133              | 0.051617458       | -0.036116846 | No              |
| row_15 | ORC1        | 5293              | 0.049074646       | -0.038097225 | No              |
| row_16 | MAD2L1      | 5456              | 0.046563897       | -0.040579047 | No              |
| row_17 | PSMB1       | 5619              | 0.044314943       | -0.043364555 | No              |
| row_18 | POLE        | 5800              | 0.042075779       | -0.04742682  | No              |
| row_19 | AURKB       | 5824              | 0.041686233       | -0.043042798 | No              |
| row_20 | MIS12       | 6078              | 0.038205985       | -0.051579334 | No              |
| row_21 | CDC45       | 6208              | 0.036402058       | -0.053646963 | No              |
| row_22 | CDKN1B      | 6372              | 0.034141313       | -0.057860393 | No              |
| row_23 | PPP2R1B     | 6397              | 0.033903234       | -0.05458148  | No              |
| row_24 | PSMF1       | 6480              | 0.032819811       | -0.054588582 | No              |
| row_25 | PSMB5       | 6582              | 0.031547815       | -0.055795975 | No              |
| row_26 | SEC13       | 6709              | 0.030256229       | -0.0585311   | No              |
| row_27 | PCNA        | 6830              | 0.02888843        | -0.06112613  | No              |
| row_28 | PSMA2       | 6843              | 0.028735703       | -0.05789542  | No              |
| row_29 | PSMB7       | 6930              | 0.027994102       | -0.05877069  | No              |
| row_30 | POLA2       | 7012              | 0.026933221       | -0.05951855  | No              |
| row_31 | ORC2        | 7128              | 0.025561647       | -0.062292147 | No              |
| row_32 | PSMB4       | 7265              | 0.024067366       | -0.06640431  | No              |
| row_33 | CENPP       | 7609              | 0.020283956       | -0.08223292  | No              |
| row_34 | PSMD1       | 7835              | 0.017730381       | -0.09201864  | No              |
| row_35 | DNA2        | 8075              | 0.015079034       | -0.10292026  | No              |
| row_36 | POLD2       | 8150              | 0.014439997       | -0.1049762   | No              |
| row_37 | RB1         | 8175              | 0.01413626        | -0.10436651  | No              |
| row_38 | PSMB2       | 8190              | 0.013974234       | -0.10323737  | No              |
| row_39 | SPC24       | 8213              | 0.013690704       | -0.10257958  | No              |
| row_40 | PSME1       | 8228              | 0.013554796       | -0.101507075 | No              |
| row_41 | PSMD2       | 8288              | 0.012868195       | -0.102963276 | No              |
| row_42 | PSMA5       | 8308              | 0.012585403       | -0.10229234  | No              |
| row_43 | MCM6        | 8356              | 0.012075243       | -0.103206016 | No              |
| row_44 | CDC7        | 8365              | 0.012001966       | -0.1020184   | No              |

|        |         |       |              |              |    |
|--------|---------|-------|--------------|--------------|----|
| row_45 | PSMA7   | 8654  | 0.009283779  | -0.11635509  | No |
| row_46 | PSMD13  | 8660  | 0.009219399  | -0.11538082  | No |
| row_47 | CENPA   | 8754  | 0.008366913  | -0.119285375 | No |
| row_48 | CCNA2   | 8814  | 0.007722416  | -0.12143643  | No |
| row_49 | KNTC1   | 8850  | 0.007500383  | -0.122318275 | No |
| row_50 | MCM3    | 8985  | 0.00620092   | -0.12873477  | No |
| row_51 | INCENP  | 8996  | 0.006086494  | -0.12845421  | No |
| row_52 | UBA52   | 9130  | 0.004652083  | -0.13502571  | No |
| row_53 | PSMC1   | 9177  | 0.004250133  | -0.13694192  | No |
| row_54 | ZW10    | 9252  | 0.003437522  | -0.14048359  | No |
| row_55 | PSMA6   | 9308  | 0.002924385  | -0.143066    | No |
| row_56 | FEN1    | 9331  | 0.002708492  | -0.1438912   | No |
| row_57 | CDC20   | 9341  | 0.002613073  | -0.14402553  | No |
| row_58 | GINS2   | 9353  | 0.002525736  | -0.14427994  | No |
| row_59 | NUP133  | 9481  | 0.001537477  | -0.15094723  | No |
| row_60 | CDKN1A  | 9525  | 0.001094356  | -0.15312718  | No |
| row_61 | DSN1    | 9558  | 7.56E-04     | -0.15475737  | No |
| row_62 | KIF23   | 9718  | -6.68E-04    | -0.1632743   | No |
| row_63 | CENPL   | 9740  | -8.37E-04    | -0.16429806  | No |
| row_64 | BUB1B   | 9794  | -0.001446374 | -0.1669718   | No |
| row_65 | PSMA4   | 9829  | -0.001751763 | -0.16857578  | No |
| row_66 | MCM5    | 9935  | -0.002679526 | -0.17389792  | No |
| row_67 | POLA1   | 10070 | -0.004085572 | -0.18060006  | No |
| row_68 | PPP1CC  | 10140 | -0.004707663 | -0.18369955  | No |
| row_69 | MCM2    | 10225 | -0.005397663 | -0.18751785  | No |
| row_70 | RPS27   | 10240 | -0.005501586 | -0.18753281  | No |
| row_71 | CLASP1  | 10438 | -0.007261591 | -0.19721645  | No |
| row_72 | NDC80   | 10458 | -0.007518849 | -0.19722968  | No |
| row_73 | E2F2    | 10592 | -0.0088706   | -0.20323154  | No |
| row_74 | PPP2CA  | 10595 | -0.008900748 | -0.20213789  | No |
| row_75 | PSMD6   | 10639 | -0.00935581  | -0.20320226  | No |
| row_76 | PPP2R5C | 10658 | -0.009549493 | -0.20288715  | No |
| row_77 | RPA1    | 10679 | -0.009714151 | -0.20265806  | No |
| row_78 | PLK1    | 10700 | -0.009900995 | -0.20240374  | No |
| row_79 | PSMD14  | 10764 | -0.010568201 | -0.20438705  | No |
| row_80 | CENPH   | 10797 | -0.010871043 | -0.20465134  | No |
| row_81 | PSMD10  | 10803 | -0.010928138 | -0.20344633  | No |
| row_82 | RCC2    | 10838 | -0.011280758 | -0.20376356  | No |
| row_83 | BIRC5   | 10915 | -0.01219511  | -0.20623091  | No |
| row_84 | GORASP1 | 10945 | -0.012437799 | -0.20612124  | No |
| row_85 | SPC25   | 10967 | -0.012651132 | -0.20554969  | No |
| row_86 | FBXO5   | 10991 | -0.012900294 | -0.20505276  | No |
| row_87 | XPO1    | 10999 | -0.012958166 | -0.2036819   | No |
| row_88 | PSMD5   | 11045 | -0.013502617 | -0.20429456  | No |
| row_89 | PSMC5   | 11091 | -0.013993829 | -0.2048409   | No |
| row_90 | BUB3    | 11099 | -0.014081244 | -0.20331839  | No |
| row_91 | SMC1A   | 11127 | -0.01435793  | -0.20284116  | No |
| row_92 | CDK2    | 11156 | -0.0147203   | -0.20236914  | No |
| row_93 | CDCA8   | 11175 | -0.014872085 | -0.20133528  | No |

|         |         |       |              |             |     |
|---------|---------|-------|--------------|-------------|-----|
| row_94  | PPP2R5A | 11232 | -0.015400457 | -0.20228714 | No  |
| row_95  | PSMC3   | 11286 | -0.015916988 | -0.20300685 | No  |
| row_96  | KIF2C   | 11292 | -0.01601707  | -0.20111465 | No  |
| row_97  | SEH1L   | 11303 | -0.016131176 | -0.19947772 | No  |
| row_98  | RFC4    | 11306 | -0.016239164 | -0.19739313 | No  |
| row_99  | POLD3   | 11351 | -0.016846346 | -0.19750015 | No  |
| row_100 | NUP43   | 11353 | -0.016848633 | -0.19527914 | No  |
| row_101 | MCM8    | 11397 | -0.017352488 | -0.19526367 | No  |
| row_102 | PSMD4   | 11542 | -0.018735401 | -0.2005289  | No  |
| row_103 | CENPI   | 11584 | -0.019157046 | -0.2001615  | No  |
| row_104 | GMNN    | 11604 | -0.019444879 | -0.19856429 | No  |
| row_105 | CENPN   | 11694 | -0.02031971  | -0.20063828 | No  |
| row_106 | CLIP1   | 11737 | -0.020687219 | -0.20011838 | No  |
| row_107 | RFC5    | 11764 | -0.021011135 | -0.19868861 | No  |
| row_108 | CENPO   | 11791 | -0.021429796 | -0.19720231 | No  |
| row_109 | KIF2B   | 11880 | -0.022366891 | -0.19894572 | No  |
| row_110 | ITGB3BP | 11882 | -0.022375619 | -0.19597836 | No  |
| row_111 | PSMA3   | 11887 | -0.022464192 | -0.19316144 | No  |
| row_112 | PSME4   | 11933 | -0.022923419 | -0.19250198 | No  |
| row_113 | MAPRE1  | 12000 | -0.023792507 | -0.19286196 | No  |
| row_114 | PSMD8   | 12059 | -0.024390291 | -0.19270813 | No  |
| row_115 | RPA2    | 12132 | -0.025276512 | -0.19319251 | No  |
| row_116 | PPP2R5D | 12180 | -0.025751742 | -0.1922594  | No  |
| row_117 | AHCTF1  | 12189 | -0.025837913 | -0.18920346 | No  |
| row_118 | MCM7    | 12196 | -0.025900668 | -0.18603076 | No  |
| row_119 | NUDC    | 12360 | -0.027554072 | -0.1911337  | No  |
| row_120 | STAG2   | 12467 | -0.028858161 | -0.19297495 | No  |
| row_121 | CASC5   | 12870 | -0.033832002 | -0.21016796 | No  |
| row_122 | PSMD7   | 12963 | -0.035054125 | -0.21041468 | No  |
| row_123 | NUP37   | 13010 | -0.035719406 | -0.20808144 | No  |
| row_124 | PPP2R1A | 13028 | -0.035851203 | -0.20416056 | No  |
| row_125 | PSMA1   | 13178 | -0.03812639  | -0.207078   | No  |
| row_126 | PSMC4   | 13206 | -0.038560357 | -0.2033326  | No  |
| row_127 | NUF2    | 13228 | -0.038782779 | -0.19923238 | No  |
| row_128 | PSMC2   | 13560 | -0.043359209 | -0.21129544 | Yes |
| row_129 | ORC5    | 13633 | -0.044281837 | -0.20921344 | Yes |
| row_130 | PSMD3   | 13696 | -0.045125268 | -0.20647623 | Yes |
| row_131 | CDT1    | 13705 | -0.045208052 | -0.20080464 | Yes |
| row_132 | ORC6    | 13805 | -0.04660701  | -0.19987024 | Yes |
| row_133 | RPA3    | 13823 | -0.046910457 | -0.19445598 | Yes |
| row_134 | SKA2    | 13843 | -0.047256727 | -0.18910322 | Yes |
| row_135 | NUP85   | 13890 | -0.047984596 | -0.18511376 | Yes |
| row_136 | MCM4    | 13897 | -0.048083164 | -0.17894566 | Yes |
| row_137 | NDEL1   | 13930 | -0.048505224 | -0.17412804 | Yes |
| row_138 | ORC3    | 13944 | -0.048703462 | -0.16825512 | Yes |
| row_139 | PSMB3   | 14033 | -0.050114714 | -0.16625161 | Yes |
| row_140 | RFC2    | 14105 | -0.051316418 | -0.16316557 | Yes |
| row_141 | PSMC6   | 14213 | -0.053108502 | -0.16178632 | Yes |
| row_142 | GINS4   | 14245 | -0.053702537 | -0.15621275 | Yes |

|         |         |       |              |              |     |
|---------|---------|-------|--------------|--------------|-----|
| row_143 | KIF20A  | 14256 | -0.053991742 | -0.14946333  | Yes |
| row_144 | PPP2R5E | 14294 | -0.054556161 | -0.14409928  | Yes |
| row_145 | SMC3    | 14332 | -0.055055123 | -0.13866787  | Yes |
| row_146 | POLE2   | 14345 | -0.055176992 | -0.13186666  | Yes |
| row_147 | RANGAP1 | 14417 | -0.05666266  | -0.12805869  | Yes |
| row_148 | SGOL2   | 14450 | -0.057184514 | -0.12206906  | Yes |
| row_149 | E2F3    | 14583 | -0.059753597 | -0.12114582  | Yes |
| row_150 | PRIM2   | 14622 | -0.060501236 | -0.11503312  | Yes |
| row_151 | KIF18A  | 14656 | -0.061017372 | -0.10858006  | Yes |
| row_152 | STAG1   | 14778 | -0.063382812 | -0.10657129  | Yes |
| row_153 | RFC3    | 14806 | -0.063871153 | -0.09940807  | Yes |
| row_154 | KIF2A   | 14818 | -0.064129725 | -0.091343805 | Yes |
| row_155 | PSMD11  | 14953 | -0.066266589 | -0.08964935  | Yes |
| row_156 | PSMD12  | 15013 | -0.067371167 | -0.08374576  | Yes |
| row_157 | CENPK   | 15015 | -0.067405671 | -0.07469781  | Yes |
| row_158 | PRIM1   | 15244 | -0.072060764 | -0.077309445 | Yes |
| row_159 | ZWINT   | 15328 | -0.073835105 | -0.0718322   | Yes |
| row_160 | BUB1    | 15515 | -0.078157432 | -0.07134699  | Yes |
| row_161 | CENPQ   | 15561 | -0.079336472 | -0.06306981  | Yes |
| row_162 | DBF4    | 15578 | -0.079763658 | -0.053165093 | Yes |
| row_163 | RANBP2  | 15887 | -0.088590801 | -0.057875257 | Yes |
| row_164 | NSL1    | 15942 | -0.090272851 | -0.048608486 | Yes |
| row_165 | SKA1    | 15955 | -0.090695322 | -0.03701108  | Yes |
| row_166 | ERCC6L  | 15971 | -0.091025256 | -0.025531521 | Yes |
| row_167 | CDC6    | 16004 | -0.092079617 | -0.014829847 | Yes |
| row_168 | ORC4    | 16074 | -0.094187342 | -0.005846482 | Yes |
| row_169 | SGOL1   | 16143 | -0.09670084  | 0.003530426  | Yes |
| row_170 | MCM10   | 16160 | -0.097206689 | 0.01579056   | Yes |
| row_171 | GINS1   | 16416 | -0.105271667 | 0.016201943  | Yes |
| row_172 | NUP107  | 16521 | -0.109604813 | 0.025372542  | Yes |
| row_173 | LIG1    | 16620 | -0.113361239 | 0.03537519   | Yes |
| row_174 | MAD1L1  | 16721 | -0.117332175 | 0.045805782  | Yes |
| row_175 | ZWILCH  | 17055 | -0.134059504 | 0.04588214   | Yes |
| row_176 | PSMB8   | 18415 | -0.298826069 | 0.012667161  | Yes |

**Supplemental Table 7 Gene Set Enrichment Analysis detailed results for G2M check point gene set presented in Figure 2A.**

| NAME   | GENE SYMBOL | RANK IN GENE LIST | RANK METRIC SCORE | RUNNING ES   | CORE ENRICHMENT |
|--------|-------------|-------------------|-------------------|--------------|-----------------|
| row_0  | E2F1        | 1361              | 0.156718403       | -0.054789737 | No              |
| row_1  | PLK4        | 1483              | 0.150512129       | -0.043174542 | No              |
| row_2  | CDC25B      | 1934              | 0.130821139       | -0.051753722 | No              |
| row_3  | CCNF        | 3006              | 0.094376273       | -0.09836331  | No              |
| row_4  | RAD54L      | 3067              | 0.092824861       | -0.09040792  | No              |
| row_5  | SQLE        | 3459              | 0.083015643       | -0.10156241  | No              |
| row_6  | ABL1        | 3533              | 0.081001498       | -0.09573825  | No              |
| row_7  | ESPL1       | 4136              | 0.068823054       | -0.12003292  | No              |
| row_8  | NOTCH2      | 4288              | 0.065757483       | -0.12027305  | No              |
| row_9  | CTCF        | 4324              | 0.065185934       | -0.11430002  | No              |
| row_10 | CKS2        | 4400              | 0.063803278       | -0.11066015  | No              |
| row_11 | ATRX        | 4407              | 0.063618734       | -0.10330575  | No              |
| row_12 | WRN         | 4691              | 0.058345981       | -0.11158917  | No              |
| row_13 | NUMA1       | 4867              | 0.055762067       | -0.1143356   | No              |
| row_14 | SMAD3       | 5156              | 0.05124452        | -0.123747006 | No              |
| row_15 | MEIS1       | 5233              | 0.049977235       | -0.12183022  | No              |
| row_16 | MAD2L1      | 5456              | 0.046563897       | -0.12823229  | No              |
| row_17 | CDK4        | 5466              | 0.046447389       | -0.123113096 | No              |
| row_18 | POLQ        | 5584              | 0.044651363       | -0.124059595 | No              |
| row_19 | SAP30       | 5670              | 0.043742169       | -0.12338284  | No              |
| row_20 | PTTG1       | 5780              | 0.04244959        | -0.12416186  | No              |
| row_21 | FANCC       | 5787              | 0.042313077       | -0.119379245 | No              |
| row_22 | POLE        | 5800              | 0.042075779       | -0.11495021  | No              |
| row_23 | AURKB       | 5824              | 0.041686233       | -0.111163914 | No              |
| row_24 | MAPK14      | 6133              | 0.037556317       | -0.123310745 | No              |
| row_25 | DTYMK       | 6155              | 0.037303891       | -0.11994513  | No              |
| row_26 | CDC45       | 6208              | 0.036402058       | -0.11836722  | No              |
| row_27 | CDKN1B      | 6372              | 0.034141313       | -0.12307358  | No              |
| row_28 | HNRNPD      | 6434              | 0.033420198       | -0.12234301  | No              |
| row_29 | TACC3       | 6616              | 0.031302478       | -0.12836686  | No              |
| row_30 | SMC2        | 6644              | 0.031033905       | -0.12608302  | No              |
| row_31 | PRPF4B      | 6700              | 0.030319352       | -0.12540182  | No              |
| row_32 | H2AFV       | 6774              | 0.029500287       | -0.1257943   | No              |
| row_33 | CUL1        | 6792              | 0.029309858       | -0.12317701  | No              |
| row_34 | AURKA       | 6793              | 0.029294247       | -0.11964094  | No              |
| row_35 | KATNA1      | 6933              | 0.027955245       | -0.12379425  | No              |
| row_36 | POLA2       | 7012              | 0.026933221       | -0.124767385 | No              |
| row_37 | SLC7A5      | 7074              | 0.026318856       | -0.124894015 | No              |
| row_38 | MTF2        | 7075              | 0.026305098       | -0.12171876  | No              |
| row_39 | H2AFZ       | 7140              | 0.025453743       | -0.12211229  | No              |
| row_40 | RACGAP1     | 7333              | 0.023281993       | -0.1297      | No              |
| row_41 | MT2A        | 7345              | 0.023153204       | -0.12750092  | No              |
| row_42 | SLC7A1      | 7485              | 0.021533174       | -0.13242944  | No              |
| row_43 | TLE3        | 7846              | 0.017618023       | -0.14979914  | No              |

|        |         |       |              |             |    |
|--------|---------|-------|--------------|-------------|----|
| row_44 | CCNT1   | 7885  | 0.017202659  | -0.14978057 | No |
| row_45 | MYC     | 7922  | 0.01674936   | -0.1497084  | No |
| row_46 | MNAT1   | 7928  | 0.016606465  | -0.14797466 | No |
| row_47 | MKI67   | 7940  | 0.016519159  | -0.14657636 | No |
| row_48 | TNPO2   | 8036  | 0.015465423  | -0.14985442 | No |
| row_49 | SRSF1   | 8207  | 0.013818503  | -0.15739301 | No |
| row_50 | CBX1    | 8332  | 0.012285059  | -0.1626255  | No |
| row_51 | MCM6    | 8356  | 0.012075243  | -0.16241352 | No |
| row_52 | PAPD7   | 8359  | 0.012042931  | -0.16106814 | No |
| row_53 | CDC7    | 8365  | 0.012001966  | -0.15989019 | No |
| row_54 | LBR     | 8466  | 0.011102905  | -0.16396563 | No |
| row_55 | SYNCRIP | 8680  | 0.009076724  | -0.17440532 | No |
| row_56 | TGFB1   | 8720  | 0.008628708  | -0.17547587 | No |
| row_57 | CENPA   | 8754  | 0.008366913  | -0.17625307 | No |
| row_58 | KIF22   | 8761  | 0.008249633  | -0.1755822  | No |
| row_59 | CCNA2   | 8814  | 0.007722416  | -0.17746618 | No |
| row_60 | TRA2B   | 8855  | 0.007460824  | -0.17873186 | No |
| row_61 | DR1     | 8889  | 0.007147476  | -0.17965625 | No |
| row_62 | SUV39H1 | 8973  | 0.006327106  | -0.1833875  | No |
| row_63 | MCM3    | 8985  | 0.00620092   | -0.18323472 | No |
| row_64 | INCENP  | 8996  | 0.006086494  | -0.1830416  | No |
| row_65 | CKS1B   | 9020  | 0.005781781  | -0.18358928 | No |
| row_66 | CHMP1A  | 9187  | 0.004068344  | -0.19208819 | No |
| row_67 | NEK2    | 9321  | 0.002809053  | -0.19895191 | No |
| row_68 | CDC20   | 9341  | 0.002613073  | -0.19966547 | No |
| row_69 | GINS2   | 9353  | 0.002525736  | -0.19995631 | No |
| row_70 | YTHDC1  | 9393  | 0.002239789  | -0.20179807 | No |
| row_71 | H2AFX   | 9419  | 0.002046646  | -0.20290492 | No |
| row_72 | KIF5B   | 9444  | 0.001788466  | -0.20398879 | No |
| row_73 | TRAIP   | 9460  | 0.001690289  | -0.20459712 | No |
| row_74 | WHSC1   | 9488  | 0.001505605  | -0.2058776  | No |
| row_75 | HMG2    | 9709  | -5.40E-04    | -0.2177269  | No |
| row_76 | KIF23   | 9718  | -6.68E-04    | -0.21807949 | No |
| row_77 | CDKN2C  | 9805  | -0.001565887 | -0.22254793 | No |
| row_78 | LMNB1   | 9847  | -0.001902872 | -0.22453865 | No |
| row_79 | MCM5    | 9935  | -0.002679526 | -0.22892684 | No |
| row_80 | CCNB2   | 9992  | -0.003238774 | -0.23156865 | No |
| row_81 | UBE2S   | 10154 | -0.004780072 | -0.23971085 | No |
| row_82 | CENPE   | 10163 | -0.004903676 | -0.23955218 | No |
| row_83 | PRC1    | 10193 | -0.00518409  | -0.24049696 | No |
| row_84 | TOP2A   | 10220 | -0.005380796 | -0.24125552 | No |
| row_85 | MCM2    | 10225 | -0.005397663 | -0.2408206  | No |
| row_86 | MARCKS  | 10280 | -0.005799085 | -0.24304505 | No |
| row_87 | BRCA2   | 10410 | -0.007079724 | -0.24917665 | No |
| row_88 | MYBL2   | 10413 | -0.007110312 | -0.24842669 | No |
| row_89 | CHAF1A  | 10422 | -0.007144003 | -0.2479976  | No |
| row_90 | TMPO    | 10427 | -0.00718301  | -0.24734718 | No |
| row_91 | NDC80   | 10458 | -0.007518849 | -0.24806428 | No |
| row_92 | UPF1    | 10468 | -0.007593007 | -0.24763514 | No |

|         |          |       |              |             |     |
|---------|----------|-------|--------------|-------------|-----|
| row_93  | E2F2     | 10592 | -0.0088706   | -0.25322565 | No  |
| row_94  | NOLC1    | 10607 | -0.009019763 | -0.25289506 | No  |
| row_95  | KPNA2    | 10610 | -0.009030681 | -0.2519133  | No  |
| row_96  | PLK1     | 10700 | -0.009900995 | -0.25553808 | No  |
| row_97  | CDC25A   | 10773 | -0.010647349 | -0.25815213 | No  |
| row_98  | MEIS2    | 10848 | -0.011353017 | -0.2607893  | No  |
| row_99  | KIF4A    | 10884 | -0.011835299 | -0.26125616 | No  |
| row_100 | BIRC5    | 10915 | -0.01219511  | -0.2614088  | No  |
| row_101 | SNRPD1   | 10929 | -0.012336033 | -0.26062375 | No  |
| row_102 | HN1      | 10935 | -0.012357932 | -0.25940284 | No  |
| row_103 | CDC27    | 10983 | -0.012831502 | -0.2603993  | No  |
| row_104 | FBXO5    | 10991 | -0.012900294 | -0.25922123 | No  |
| row_105 | XPO1     | 10999 | -0.012958166 | -0.25803617 | No  |
| row_106 | SMC4     | 11042 | -0.013477089 | -0.25868395 | No  |
| row_107 | G3BP1    | 11077 | -0.013836495 | -0.25885507 | No  |
| row_108 | ODF2     | 11085 | -0.01392013  | -0.2575539  | No  |
| row_109 | BUB3     | 11099 | -0.014081244 | -0.2565582  | No  |
| row_110 | SMC1A    | 11127 | -0.01435793  | -0.2562873  | No  |
| row_111 | TROAP    | 11153 | -0.014698663 | -0.25586694 | No  |
| row_112 | CUL5     | 11290 | -0.015987195 | -0.26130244 | No  |
| row_113 | KIF2C    | 11292 | -0.01601707  | -0.2594232  | No  |
| row_114 | RAD23B   | 11467 | -0.017970007 | -0.2666773  | No  |
| row_115 | HNRNPU   | 11615 | -0.019587684 | -0.2722739  | No  |
| row_116 | ILF3     | 11857 | -0.022144739 | -0.28265256 | No  |
| row_117 | EXO1     | 11900 | -0.02262456  | -0.28219613 | No  |
| row_118 | HMGB3    | 12111 | -0.025044467 | -0.29054594 | Yes |
| row_119 | KIF11    | 12115 | -0.02508856  | -0.28768    | Yes |
| row_120 | RPA2     | 12132 | -0.025276512 | -0.2854954  | Yes |
| row_121 | SRSF10   | 12141 | -0.025343958 | -0.2828694  | Yes |
| row_122 | EZH2     | 12208 | -0.026082395 | -0.28329536 | Yes |
| row_123 | GSPT1    | 12304 | -0.027047446 | -0.28517538 | Yes |
| row_124 | RBM14    | 12315 | -0.027178461 | -0.28243625 | Yes |
| row_125 | CASP8AP2 | 12370 | -0.027624356 | -0.2820262  | Yes |
| row_126 | CUL3     | 12435 | -0.028514441 | -0.28205028 | Yes |
| row_127 | RBL1     | 12564 | -0.029948598 | -0.28536725 | Yes |
| row_128 | TFDP1    | 12581 | -0.030111782 | -0.282599   | Yes |
| row_129 | RPS6KA5  | 12627 | -0.030553861 | -0.28134793 | Yes |
| row_130 | NCL      | 12735 | -0.032019675 | -0.28327763 | Yes |
| row_131 | HMGA1    | 12789 | -0.032835197 | -0.28218442 | Yes |
| row_132 | CASC5    | 12870 | -0.033832002 | -0.28243312 | Yes |
| row_133 | ARID4A   | 13087 | -0.036650982 | -0.28970686 | Yes |
| row_134 | TOP1     | 13143 | -0.037474807 | -0.28816193 | Yes |
| row_135 | TPX2     | 13187 | -0.038370389 | -0.28585902 | Yes |
| row_136 | CENPF    | 13239 | -0.03892329  | -0.2839226  | Yes |
| row_137 | PBK      | 13279 | -0.039455779 | -0.28127205 | Yes |
| row_138 | E2F4     | 13333 | -0.040298577 | -0.27927795 | Yes |
| row_139 | HIF1A    | 13386 | -0.041028004 | -0.27714166 | Yes |
| row_140 | KIF20B   | 13545 | -0.043129083 | -0.28049234 | Yes |
| row_141 | CDKN3    | 13548 | -0.043235697 | -0.2753817  | Yes |

|         |         |       |              |              |     |
|---------|---------|-------|--------------|--------------|-----|
| row_142 | ORC5    | 13633 | -0.044281837 | -0.27458566  | Yes |
| row_143 | AMD1    | 13664 | -0.044659648 | -0.27081954  | Yes |
| row_144 | SFPQ    | 13767 | -0.046027981 | -0.27078754  | Yes |
| row_145 | ORC6    | 13805 | -0.04660701  | -0.26716545  | Yes |
| row_146 | SS18    | 13907 | -0.048222572 | -0.26681438  | Yes |
| row_147 | EWSR1   | 14015 | -0.049758371 | -0.26660284  | Yes |
| row_148 | KPNB1   | 14080 | -0.05091409  | -0.2639231   | Yes |
| row_149 | DDX39A  | 14238 | -0.05356881  | -0.26595944  | Yes |
| row_150 | HUS1    | 14352 | -0.055302564 | -0.26540363  | Yes |
| row_151 | BARD1   | 14357 | -0.055410054 | -0.2589318   | Yes |
| row_152 | CHEK1   | 14475 | -0.057654131 | -0.25830874  | Yes |
| row_153 | E2F3    | 14583 | -0.059753597 | -0.25689068  | Yes |
| row_154 | PRIM2   | 14622 | -0.060501236 | -0.25164562  | Yes |
| row_155 | EGF     | 14625 | -0.060540184 | -0.2444462   | Yes |
| row_156 | STAG1   | 14778 | -0.063382812 | -0.24502712  | Yes |
| row_157 | SMARCC1 | 14803 | -0.063813373 | -0.23862405  | Yes |
| row_158 | CDK1    | 14859 | -0.064751908 | -0.23378654  | Yes |
| row_159 | NUP50   | 15136 | -0.070052542 | -0.24027778  | Yes |
| row_160 | PRMT5   | 15251 | -0.072256193 | -0.23772968  | Yes |
| row_161 | STIL    | 15254 | -0.072285421 | -0.2291125   | Yes |
| row_162 | SETD8   | 15355 | -0.074522823 | -0.2255326   | Yes |
| row_163 | NASP    | 15360 | -0.074680902 | -0.21673459  | Yes |
| row_164 | PURA    | 15380 | -0.075120121 | -0.20869592  | Yes |
| row_165 | HOXC10  | 15486 | -0.07763321  | -0.20501134  | Yes |
| row_166 | BUB1    | 15515 | -0.078157432 | -0.19709344  | Yes |
| row_167 | DBF4    | 15578 | -0.079763658 | -0.19082297  | Yes |
| row_168 | HMMR    | 15597 | -0.080221504 | -0.18211435  | Yes |
| row_169 | SLC12A2 | 15699 | -0.08292491  | -0.1775744   | Yes |
| row_170 | NUSAP1  | 15707 | -0.0832614   | -0.16790311  | Yes |
| row_171 | RASAL2  | 15872 | -0.088339306 | -0.16612145  | Yes |
| row_172 | KIF15   | 15890 | -0.088737033 | -0.15633078  | Yes |
| row_173 | CDC6    | 16004 | -0.092079617 | -0.15133566  | Yes |
| row_174 | TTK     | 16009 | -0.092156589 | -0.14042819  | Yes |
| row_175 | CUL4A   | 16034 | -0.092999697 | -0.13050206  | Yes |
| row_176 | LIG3    | 16189 | -0.097893432 | -0.12702557  | Yes |
| row_177 | CCND1   | 16222 | -0.098884001 | -0.116822414 | Yes |
| row_178 | PDS5B   | 16845 | -0.123433277 | -0.13560829  | Yes |
| row_179 | SLC38A1 | 17041 | -0.133503616 | -0.13005376  | Yes |
| row_180 | PML     | 18090 | -0.220967993 | -0.16013703  | Yes |
| row_181 | EFNA5   | 18199 | -0.240506396 | -0.1369547   | Yes |
| row_182 | UBE2C   | 18251 | -0.252355397 | -0.10925519  | Yes |
| row_183 | DMD     | 18585 | -0.43001008  | -0.075383335 | Yes |
| row_184 | FOXN3   | 18644 | -0.652773023 | 2.71E-04     | Yes |

**Supplemental Table 8. Mutations identified in the used human cell lines.**

| Gene          | Exon  | OCI-AML3                                                     | K562                 | SET2                                                           |
|---------------|-------|--------------------------------------------------------------|----------------------|----------------------------------------------------------------|
| <i>TET1</i>   | E2    | rs12773594 (T/A)<br>rs12221107 (C/T)                         | rs10823229 (A/G)     | rs12773594 (T/A homo)<br>rs12221107 (C/T)<br>rs150689919 (C/T) |
|               | I3-4  | rs966578 (T/C)                                               |                      |                                                                |
|               | E4    | rs370296152 (C/T)<br>rs71483917 (ATA/GTG)<br>rs3998860 (A/G) | rs3998860 (A/G homo) | rs3998860 (A/G homo)                                           |
|               | I4-I5 | rs36081642 C/T<br>rs34757215 (A/C)<br>rs12243354 (G/A)       |                      |                                                                |
|               | E11   |                                                              |                      | no rs (c.5363C>A)                                              |
| <i>DNMT3A</i> | E9    | rs2276599 (C>T homo)                                         | rs2276599 (C>T homo) | rs2276599 (C>T)                                                |
|               | E18   |                                                              |                      | rs2289195 (G>A)                                                |
|               | E23   | rs377577594 (C>T) R882C                                      |                      |                                                                |
| <i>JAK2</i>   | E14   |                                                              |                      | rs77375493 (V617F)                                             |

**Supplemental Table 9. Primers for mutation analysis in cell lines.**

| Name                  | Forward primer (5'-3') | Reverse primer (5'-3') | Amplicon size (bp) |
|-----------------------|------------------------|------------------------|--------------------|
| <i>TET1_E1_1</i>      | CTGGGCAACAGAATGAGACC   | GTCGCCTGCTAAGAGAGGTG   | 591                |
| <i>TET1_E1_2</i>      | AGGGAGCCAACAAAAATGTG   | TGGGGAACCACTGGTATCAT   | 626                |
| <i>TET1_E1_3</i>      | GGTCGTAGCCAAATCCAAAA   | CAGGAAGGAAGACAGGCAAG   | 944                |
| <i>TET1_E1_4</i>      | ATGATACCAGTGGTTCCCCA   | GACCAGCCTGAGAGAGTTGG   | 912                |
| <i>TET1_E1_5</i>      | CTTGCTGTCTTCCTTCCTG    | CAAGTGTCTAGCTGTCTCCA   | 672                |
| <i>TET1_E1_6</i>      | CCAACTCTCTCAGGCTGGTC   | GCTAAGGCATCACTGCACAA   | 531                |
| <i>TET1_E2</i>        | GCAAGCAAGATGGCTACCTC   | GCAACACCACAAATGCAGAT   | 653                |
| <i>TET1_E3</i>        | TCGCTGAATGTGTGAAAAGC   | TGGGGAGGAATTCTCTGATG   | 905                |
| <i>TET1_E4_1</i>      | GTAAATGGCCCCAAGTCAGA   | AAGTTTTGGTGGCTCTCCCT   | 870                |
| <i>TET1_E4_2</i>      | AGAATTCGGCAAGACATTGG   | GGTATGGGTTGCATCCTGAC   | 874                |
| <i>TET1_E4_3</i>      | CATCAGAGAATTCCTCCCCA   | CAAATGTCGCATATTGTGCC   | 859                |
| <i>TET1_E4_4</i>      | CATCAGTTGCCACCAAGAAA   | GCAATGTTGGCAGTCTCTGA   | 907                |
| <i>TET1_E4_5</i>      | GGCTCAAACGAGGTCCATTA   | TATTTTTCCACTTGAGCGGG   | 856                |
| <i>TET1_E4_6</i>      | TCAGAGACTGCCAACATTGC   | TATTTTTCCACTTGAGCGGG   | 552                |
| <i>TET1_E5</i>        | GTTAGGGGCAGGAAGAAAGG   | ATGATGGGTGGCTCAGTAGG   | 468                |
| <i>TET1_E6</i>        | CCCTTGACACTGCATACCCT   | GCTCTGGAATAACAAGCTTCAA | 420                |
| <i>TET1_E7</i>        | GTTGAGGCAGTGGAAAGTCC   | TGCACCTGGTCACAGTGAAG   | 753                |
| <i>TET1_E8</i>        | AACCGTTCCTTAGGCATCC    | CAGGGACAATTGGAATTTGG   | 482                |
| <i>TET1_E9</i>        | TTAACACCATCAGCCATGA    | CAGCATTTTTGGAGGGTGAG   | 333                |
| <i>TET1_E10</i>       | TTGTGCTCCATGCTTTCTTTT  | AAGGACTGCAGCCTAAGCAT   | 227                |
| <i>TET1_E11</i>       | TCCCATTTCATGTTTTCTCC   | CCAGGTTCCATAGGGCTCAC   | 400                |
| <i>TET1_E12_1</i>     | ATTGAACAGAGTTGGGTGGC   | CAAGGCAAAGTCCAACACA    | 596                |
| <i>TET1_E12_2</i>     | CCAACCAACACAACATCAGC   | GGGGTCATCAGATAGGGGTT   | 659                |
| <i>TET1_E12_3</i>     | CTCCACTGAAGAATGACGCA   | AGGCATTAAGAGGGGGAGAA   | 859                |
| <i>TET1_E12_4</i>     | AACCCCTATCTGATGACCCC   | AATACCCACCCCGTTTTGTT   | 648                |
| <i>DNMT3A_E7-8</i>    | ATGGTCCCCTTGAGTGTGAG   | CATCACCCCAATTCCAGACT   | 836                |
| <i>DNMT3A_E9-10</i>   | CTGTATCTGGTCCCCTCCAG   | CTCCCTAAGCATGGCTTTCC   | 747                |
| <i>DNMT3A_E11-12</i>  | GGGAACAAGTTGGAGACCAG   | GGTCCCATGTCATTCAAACC   | 490                |
| <i>DNMT3A_E13</i>     | GTCACAGTGCTCCCTTTTC    | TGGACACAGTCAGCCAGAAG   | 308                |
| <i>DNMT3A_E14</i>     | CAGGGCTTAGGCTCTGTGAG   | AGGTGTGCTACCTGGAATGG   | 359                |
| <i>DNMT3A_E15-16</i>  | CGGTCTTTCCATTCCAGGTA   | CATCATTTCTGTTTTGCCAGA  | 614                |
| <i>DNMT3A_E17</i>     | GACTTGGGCCTACAGCTGAC   | CAAAATGAAAGGAGGCAAGG   | 345                |
| <i>DNMT3A_E18-19</i>  | CTTCCTGTCTGCCTCTGTCC   | ATGAAGCAGCAGTCCAAGGT   | 552                |
| <i>DNMT3A_E19b-20</i> | GCAGCACTGTGCAATATGGT   | CTTCCCCACTATGGGTCATC   | 549                |
| <i>DNMT3A_E21</i>     | GCGGGGAGTTTGAAGAGAGT   | CCACACTAGCTGGAGAAGCA   | 342                |
| <i>DNMT3A_E22</i>     | TTTGGTAGACGCATGACCAG   | CAGGACGTTTGTGGAAAACA   | 301                |
| <i>DNMT3A_E23</i>     | TCCTGCTGTGTGGTTAGACG   | CCTCTCTCCCACCTTTCTC    | 654                |
| <i>JAK2_E14</i>       | TCCTCAGAACGTTGATGGCAG  | ATTGCTTTCTTTTTTCAAGAT  | 453                |
